# Supplementary material for: Improving accuracy of self-reported diagnoses of rheumatoid arthritis in the French prospective E3N-EPIC cohort: a validation study
Source: PubMed Central journal article supplement — BMJ Open. 2019 Dec 16;9(12):e033536. doi: 10.1136/bmjopen-2019-033536 (PMC6937120; doi:10.1136/bmjopen-2019-033536), 2019-12-16
Supplement: bmjopen-2019-033536.draft_revisions.pdf [file bmjopen-2019-033536.draft_revisions.pdf]

# BMJ Open

BMJ Open is committed to open peer review. As part of this commitment we make the peer review history of every article we publish publicly available.

When an article is published we post the peer reviewers' comments and the authors' responses online. We also post the versions of the paper that were used during peer review. These are the versions that the peer review comments apply to.

The versions of the paper that follow are the versions that were submitted during the peer review process. They are not the versions of record or the final published versions. They should not be cited or distributed as the published version of this manuscript.

BMJ Open is an open access journal and the full, final, typeset and author-corrected version of record of the manuscript is available on our site with no access controls, subscription charges or pay-per-view fees (<http://bmjopen.bmj.com>).

If you have any questions on BMJ Open's open peer review process please email [info.bmjopen@bmj.com](mailto:info.bmjopen@bmj.com)

# BMJ Open

## Improving Accuracy of Self-Reported Diagnoses of Rheumatoid Arthritis in the French Prospective E3N-EPIC cohort

|                               |                                                                                                                                                                                                                                                                                                                                                                                                                                                                                                                                                                                                                                                                                                                                                                                                                                                                                                                                                                                                                     |
|-------------------------------|---------------------------------------------------------------------------------------------------------------------------------------------------------------------------------------------------------------------------------------------------------------------------------------------------------------------------------------------------------------------------------------------------------------------------------------------------------------------------------------------------------------------------------------------------------------------------------------------------------------------------------------------------------------------------------------------------------------------------------------------------------------------------------------------------------------------------------------------------------------------------------------------------------------------------------------------------------------------------------------------------------------------|
| Journal:                      | <i>BMJ Open</i>                                                                                                                                                                                                                                                                                                                                                                                                                                                                                                                                                                                                                                                                                                                                                                                                                                                                                                                                                                                                     |
| Manuscript ID                 | bmjopen-2019-033536                                                                                                                                                                                                                                                                                                                                                                                                                                                                                                                                                                                                                                                                                                                                                                                                                                                                                                                                                                                                 |
| Article Type:                 | Research                                                                                                                                                                                                                                                                                                                                                                                                                                                                                                                                                                                                                                                                                                                                                                                                                                                                                                                                                                                                            |
| Date Submitted by the Author: | 09-Aug-2019                                                                                                                                                                                                                                                                                                                                                                                                                                                                                                                                                                                                                                                                                                                                                                                                                                                                                                                                                                                                         |
| Complete List of Authors:     | Nguyen, Yann; CESP, INSERM U1018, Université Paris-Saclay, Université Paris-Sud Villejuif; Hôpital Bicêtre, Rheumatology<br>Salliot, C; Regional Hospital Centre Orleans La Source Hospital, Rheumatology; CESP, INSERM U1018, Université Paris-Saclay, Université Paris-Sud Villejuif<br>Gusto, Gaëlle; CESP, INSERM U1018, Université Paris-Saclay, Université Paris-Sud Villejuif<br>Descamps, Elise; CESP, INSERM U1018, Université Paris-Saclay, Université Paris-Sud Villejuif<br>Mariette, Xavier; Hôpital Bicêtre, Rheumatology; Center for Immunology of Viral Infections and Auto-immune Diseases (IMVA), INSERM U1184, Université Paris-Saclay, Université Paris-Sud<br>Boutron-Ruault, Marie-Christine; CESP, INSERM U1018, Université Paris-Saclay, Université Paris-Sud Villejuif; Gustave Roussy Institute<br>Seror, Raphaële; Hôpital Bicêtre, Rheumatology; Center for Immunology of Viral Infections and Auto-immune Diseases (IMVA), INSERM U1184, Université Paris-Saclay, Université Paris-Sud |
| Keywords:                     | rheumatoid arthritis, self-report, cohort, risk factors, accuracy, Epidemiology < TROPICAL MEDICINE                                                                                                                                                                                                                                                                                                                                                                                                                                                                                                                                                                                                                                                                                                                                                                                                                                                                                                                 |
|                               |                                                                                                                                                                                                                                                                                                                                                                                                                                                                                                                                                                                                                                                                                                                                                                                                                                                                                                                                                                                                                     |

SCHOLARONE™  
Manuscripts

1  
2  
3 **Improving Accuracy of Self-Reported Diagnoses of Rheumatoid Arthritis in the French**  
4 **Prospective E3N-EPIC cohort**

5 Yann Nguyen<sup>1,2</sup> MD, MPH, Carine Salliot<sup>1,3</sup> MD, MPH, Gaëlle Gusto<sup>1,4</sup> PhD, Elise  
6 Descamps<sup>2</sup> MD, MPH, Xavier Mariette<sup>2,5</sup> MD, PhD, Marie-Christine Boutron-Ruault<sup>1,4</sup>\* MD,  
7 PhD, Raphaële Seror<sup>2,5</sup>† MD, PhD

8  
9  
10  
11 \*Corresponding author

12  
13 †These authors equally contributed to this work  
14  
15  
16

17 **Affiliations:**

18  
19 <sup>1</sup>Center for Research in Epidemiology and Population Health, (CESP), Institut pour la Santé  
20 et la Recherche Médicale (INSERM) U1018, Université Paris-Saclay, Université Paris-Sud,  
21 Villejuif, France

22  
23  
24 <sup>2</sup>Department of rheumatology, Assistance Publique-Hôpitaux de Paris (AP-HP), Hôpitaux  
25 universitaires Paris-Sud – Hôpital Bicêtre, Le Kremlin Bicêtre, France

26  
27 <sup>3</sup>Department of rheumatology, Centre Hospitalier Régional d'Orléans, Orléans, France

28  
29 <sup>4</sup>Gustave Roussy Institute, Villejuif, France

30  
31 <sup>5</sup>Université Paris-Sud, Center for Immunology of Viral Infections and Auto-immune Diseases  
32 (IMVA), Institut pour la Santé et la Recherche Médicale (INSERM) UMR 1184, Université  
33 Paris-Saclay, Le Kremlin Bicêtre, France  
34  
35  
36

37  
38 **Correspondence:**

39 Dr Marie-Christine Boutron-Ruault, Inserm U1018, Health across Generations Team, EMT,  
40 Institut Gustave Roussy, 114 rue Edouard Vaillant, 94805 Villejuif Cedex, France

41  
42 Tel +33 1 42 11 64 66, Fax: +33 1 42 11 40 00.

43  
44 Email: [marie-christine.boutron@gustaveroussy.fr](mailto:marie-christine.boutron@gustaveroussy.fr)  
45  
46  
47

48 **Word count**

49 Abstract: 246; Manuscript: 3473  
50  
51  
52

53 **Key words:**

54 Rheumatoid arthritis; self-report; epidemiology; cohort studies; risk factors  
55  
56  
57  
58  
59  
60

## ABSTRACT

### Objectives

The French E3N-EPIC cohort enrolled 98,995 women aged 40–65 years at inclusion since 1990 to study the main risk factors for cancer and severe chronic conditions in women. They were prospectively followed with biennially self-administered questionnaires collecting self-reported medical, environmental, and lifestyle data. Our objective was to assess the accuracy of self-reported diagnoses of rheumatoid arthritis (RA) and to devise algorithms to improve the ascertainment of RA cases in our cohort.

### Methods

Women who self-reported an inflammatory rheumatic disease (IRD) were asked to provide access to their medical record, and to answer an IRD questionnaire. Medical records were independently reviewed. Positive predictive values (PPV) of self-reported RA alone, then coupled with the IRD questionnaire, and with a medication reimbursement database were then assessed. These algorithms were then applied to the whole cohort to ascertain RA cases.

### Results

Of the 98,995 participants, 2692 self-reported RA. Medical records were available for a sample of 399 participants, including 305 who self-reported RA. Self-reported RA was accurate only for 42% participants. Combining self-reported diagnoses to answers to a specific IRD questionnaire or to the medication reimbursement database improved the PPV (75.6% and 90.1%, respectively). Using the devised algorithms, we could identify 964 RA cases in our cohort.

### Conclusion

Accuracy of self-reported RA is poor but adding answers to a specific questionnaire or data from a medication reimbursement database performed satisfactorily to identify RA cases in our cohort. It will subsequently allow investigating many potential risk factors of RA in women.

## ARTICLE SUMMARY

### Strengths and limitations of this study

- Two algorithms were devised and tested to improve accuracy of self-reported diagnosis of rheumatoid arthritis in a large population-based cohort.
- A large sample of medical records was available and independently reviewed to test the devised algorithm.
- Nearly a thousand cases of rheumatoid arthritis were identified, which will subsequently allow investigating many potential risk factors of rheumatoid arthritis in this cohort.
- The control population was women who self-reported another rheumatic disease and not healthy women.
- The sample of medical records was not provided at random.

## INTRODUCTION

Rheumatoid arthritis (RA) is the most common autoimmune inflammatory rheumatic disease (IRD) in adults, and is a major cause of functional alteration and handicap. RA is a complex multifactorial autoimmune disease in which both genetic and environmental factors interact in the pathogenesis of the disease to trigger auto-immunity [1].

Little is known about environmental factors that may contribute to the disease, except smoking, which has been reproducibly reported as associated with an increased risk of anti-citrullinated protein autoantibody (ACPA)-positive RA, particularly in individuals carrying the HLA-DRB1-shared epitope alleles [2–6]. The role of other environmental factors has been suggested but results were rarely reproducible. Only epidemiological studies, such as case-control studies or cohort studies can appropriately address the question. The main advantage of case-control studies is that cases are easily ascertained, with detailed phenotypes and easy availability of biological data, but their main limits are a retrospective collection of environmental factors, the risk of hindsight and recall bias, and a potentially biased control population. Cohort studies offer the advantage of having a prospective collection of environmental factors before disease onset and a non-biased non-cases population. However, collected information about disease phenotypes is usually limited, and in large population-based cohorts, diagnoses are often self-reported.

The diagnosis accuracy of self-reported RA has been studied in various populations, and vary considerably, between 7 and 96% [7–15]. One of the evocated reasons is the confusion between RA and other forms of arthritis, mainly osteoarthritis (OA), the prevalence of which being higher than RA in general populations [16]. If the accuracy of self-reported diagnosis is poor, using self-reported RA alone as case definition might create an ascertainment bias, because of the high rate of false positive cases.

To overcome this lack of accuracy, some studies have used a linkage with national patient registries, primary health care records and/or hospital discharge databases usually based on International Classification of Diseases (ICD) codes [17–21]. However, such registries are not always available, and these methods can also lack specificity [22]. Other studies have ascertained self-reported RA with a medical record review [23,24]. However, in large cohorts, medical record screening is time-consuming, expensive, and subject to difficulties in obtaining patients' consents and medical charts [12]. These difficulties underscore the need for increasing accuracy of RA case definition based on self-reported and/or other available information.

1  
2  
3 Our primary objective was to evaluate the accuracy of self-reported diagnoses of RA in a  
4 French population-based cohort and to determine if the use of additional information obtained  
5 from a dedicated questionnaire and from a medication reimbursement database could improve  
6 their accuracy. A secondary objective was to use the devised algorithms to identify RA cases  
7 in this large cohort for subsequent epidemiological studies.  
8  
9  
10  
11  
12

## 13 MATERIAL AND METHODS

### 14 15 16 17 **The E3N-EPIC cohort study**

18 The E3N cohort study (*Etude Epidémiologique auprès des femmes de la Mutuelle générale de*  
19 *l'Education Nationale*) is a French prospective cohort study including 98,995 women living in  
20 France and covered by a national health insurance scheme primarily involving teachers [25].  
21 This study is also the French component of the European Prospective Investigation into  
22 Cancer and Nutrition (EPIC). It was initiated in France in 1990 to study the main risk factors  
23 for cancer and severe chronic conditions in women. Participants ages were 40 to 65 at  
24 inclusion. After the baseline questionnaire (Q1), participants were biennially mailed  
25 questionnaires (Q2 to Q12) to update their health-related information and newly diagnosed  
26 diseases. The last questionnaire to date (Q12) was sent in 2018, but corresponding data are not  
27 yet available. Besides, a drug-reimbursement claims database has been available since 2004  
28 for all cohort women from their medical insurance records (*Mutuelle Générale de l'Éducation*  
29 *Nationale* [MGEN]). The average follow-up rate per questionnaire has been 83% and, overall,  
30 the total proportion of patients lost to follow-up since 1990 was < 3% in 2014. All women  
31 gave written informed consent, and approvals were obtained from the French National  
32 Commission for Data Protection and Individual Freedom (327346-V14) and the French  
33 Advisory Committee on Information Processing in Material Research in the Field of Health  
34 (13.794).  
35  
36  
37  
38  
39  
40  
41  
42  
43  
44  
45  
46  
47  
48  
49

### 50 **Participants**

51 In three follow-up questionnaires (Q9, Q10, and Q11, sent in 2007, 2011, and 2014,  
52 respectively), study participants self-reported a diagnosis of IRD (RA and/or spondyloarthritis  
53 [SpA]) by answering the following questions: “Do you have RA?” (yes/no) at Q9, Q10, and  
54 Q11, and “Do you have ankylosing spondylitis” (yes/no) at Q10 and Q11, together with the  
55 date of IRD diagnosis. In addition, women were asked at each questionnaire from baseline if  
56 they had been hospitalized since the last questionnaire, and if so, they had to specify the  
57  
58  
59  
60

1  
2  
3 reasons for those admissions. All women who self-reported RA or SpA in questionnaires  
4 and/or in hospitalization reasons were eligible to participate in the validation study, those who  
5 self-reported SpA serving as a control population.  
6  
7  
8  
9

### 10 **IRD questionnaire design**

11 A specific IRD questionnaire was designed to ascertain diagnoses of RA and SpA (S1  
12 Appendix). The questionnaire was adapted from a telephone questionnaire designed by  
13 Guillemin *et al*, with reference to the signs, symptoms, and epidemiological criteria for RA  
14 (American College of Rheumatology 1987) [26,27]. Since Guillemin's questionnaire was not  
15 designed to be sent by mail, we adapted it with the help of a patients' association (*Association*  
16 *Française des Polyarthrites et rhumatismes inflammatoires chroniques* [AFPric]). In this IRD  
17 questionnaire, women had the possibility to confirm or retract their self-reported diagnosis  
18 (S1 Appendix, Q0, Q1). We included additional questions: if a physician confirmed the  
19 diagnosis (only a general practitioner, a rheumatologist, and/or an internist), date of diagnosis,  
20 date of first symptoms, presence of ACPA, and current and past treatments.  
21  
22  
23  
24  
25  
26  
27  
28

29 All eligible women were sent this specific IRD questionnaire with an information letter and  
30 were asked to send back the questionnaire and their medical chart comprising all relevant  
31 medical documents in relation with their rheumatic condition, including medical reports,  
32 laboratory findings, hand and foot radiographs, and results of rheumatoid factors (RF) and  
33 anti-citrullinated protein antibodies (ACPA) testing, when available. A first mailing was sent  
34 on June 2017, and a reminder was sent in December 2017 to those who did not answer the  
35 first one.  
36  
37  
38  
39  
40  
41  
42

### 43 **RA ascertainment algorithm from IRD questionnaire**

44 Based on data from the IRD questionnaire, a decision algorithm aimed at improving the  
45 accuracy of self-reported RA was devised by a consensus of rheumatologists (RS, XM, and  
46 ED). We considered as RA cases women who confirmed having RA in the IRD specific  
47 questionnaire, and self-reported at least one of the following: 1) RA diagnosis confirmed by a  
48 rheumatologist and/or another physician (internal medicine specialist or general practitioner)  
49 2) taking or having taken any of the RA conventional synthetic disease modifying anti-  
50 rheumatic drugs (DMARDs) or biologic DMARDs (listed in S1 Appendix, Question 34), 3)  
51 having positive RF or ACPA, or 4) at least 4 of the seven 1987-ACR criteria (listed in S1  
52 Appendix, Questions 8,9,11,14–18).  
53  
54  
55  
56  
57  
58  
59  
60



### **RA ascertainment algorithm from medication reimbursement database**

The MGEN medication reimbursement database included, for all E3N participants, all medications delivered by community-based pharmacies since 2004. Thus, medications only delivered by hospital pharmacies (*ie* intravenous infusions), and medications used before 2004 were not available.

Using this medication reimbursement database, we devised a second algorithm: women were considered as RA cases if they self-reported having RA, and had had reimbursements for any medication considered to be used in the treatment of RA: conventional synthetic or biologic DMARD among methotrexate, leflunomide, any sub-cutaneous tumor necrosis factor alpha (TNF- $\alpha$ ) inhibitor, and sub-cutaneous abatacept or tocilizumab. Oral steroids, being widely used for other reasons, were not considered specific enough to be included in this definition. This algorithm had been previously used to ascertain RA cases in our cohort [28].

### **RA cases ascertainment: medical chart review**

Medical records were obtained from the IRD questionnaire mailing for a subset of women and included medical reports from hospitalization and/or from outpatient medical visits, laboratory findings and/or bone X-rays. They were independently reviewed by 2 trained rheumatologists (YN and RS), blinded to the self-reported diagnoses and confirmed cases or not according to the RA diagnosis algorithm. Classification was based on reviewer's expertise, and not on strict American college of rheumatology (ACR) 1987 criteria or ACR/European League against Rheumatism (EULAR) 2010 criteria [27,29], and was used as the reference to assess the accuracy of self-reported diagnosis of RA alone and associated with additional information from a specific IRD questionnaire and from a medication reimbursement database. If the provided medical data were enough to confirm a diagnosis, reviewers classified women as RA, or not RA (including alternate diagnoses, such as OA, SpA, or other). Disagreements between the 2 reviewers were resolved by consensus. If diagnosis could not be ascertained by medical chart review, cases were considered as uncertain and were not used for determining the accuracy of the algorithms.

### **Identification of RA cases in the E3N cohort**

Since, we expected that the accuracy of self-reported RA diagnoses alone would not be sufficient, we used the devised algorithms to identify RA cases in our cohort (including women who did not provide their medical records). For women who answered the IRD questionnaire, we used the algorithm based on this questionnaire, and for those who self-

1  
2  
3 reported RA in Q9, Q10, and/or Q11 but did not answer the specific IRD questionnaire, were  
4 deceased or lost to follow-up, we subsequently used the algorithm based on the medication  
5 reimbursement database. Women with available medical record who were identified as RA  
6 cases by these algorithms were reassessed as non-cases if their diagnosis was invalidated by  
7 medical chart review (false positive cases).  
8  
9  
10  
11  
12

### 13 **Statistical analysis**

14  
15 To assess the accuracy of self-reported diagnosis alone, and the two algorithms based on the  
16 IRD questionnaire and/or the medication reimbursement database, we used the classification  
17 based on medical chart review as the gold standard. Thus, this assessment was performed on  
18 the subset of participants with an available medical chart and for whom its review allowed to  
19 classify them as case or non-case. The level of agreement between each algorithm and the  
20 chart review diagnoses was assessed by the kappa statistic with 95% confidence intervals.  
21 Positive predictive value (PPV) and negative predictive value (NPV), sensitivity and  
22 specificity of each algorithm were calculated.  
23  
24  
25  
26  
27  
28

29 Finally, a descriptive analysis of demographic characteristics was performed on all women  
30 enrolled in the E3N study, on women who self-reported RA, on those who self-reported RA  
31 and provided their medical charts, on chart-reviewed confirmed RA, and on RA cases  
32 identified by combining self-report to the IRD questionnaire and/or the medication  
33 reimbursement database. All analyses were carried out using the SAS software, version 9.4  
34 (SAS Institute Inc., Cary, North Carolina, USA).  
35  
36  
37  
38  
39  
40  
41  
42  
43  
44  
45  
46  
47  
48  
49  
50  
51  
52  
53  
54  
55  
56  
57  
58  
59  
60

## RESULTS

### IRD case identification

Among the 98,995 participants, 3,230 women self-reported RA and/or SpA and were eligible to participate in the validation study: 2,692 self-reported RA, 637 self-reported SpA, and 109 women self-reported both RA and SpA. Demographic characteristics of the whole cohort, and of women who self-reported RA is described in Table 1.

For peer review only

**Table 1. Baseline characteristics of the study population**

|                                                   | All women<br>(N=98,995) | Self-<br>reported<br>RA<br>(N=2,692) | Self-reported<br>RA with<br>available<br>medical<br>records<br>(N=305) | Confirmed<br>RA after<br>chart review<br>(N=129) | Identified<br>RA<br>with devised<br>algorithms<br>(N=964) |
|---------------------------------------------------|-------------------------|--------------------------------------|------------------------------------------------------------------------|--------------------------------------------------|-----------------------------------------------------------|
| N                                                 |                         |                                      |                                                                        |                                                  |                                                           |
| Age at Q1 (years)                                 | 49.4 (6.7)              | 51.1 (6.7)                           | 49.6 (5.6)                                                             | 48.5 (5.2)                                       | 50.2 (6.3)                                                |
| Year of birth                                     |                         |                                      |                                                                        |                                                  |                                                           |
| < 1930                                            | 7,808 (7.9)             | 278 (10.3)                           | 13 (4.3)                                                               | 2 (1.6)                                          | 59 (6.1)                                                  |
| [1930–1940]                                       | 31,529<br>(31.9)        | 1,114<br>(41.4)                      | 112 (36.7)                                                             | 37 (28.7)                                        | 380 (39.4)                                                |
| [1940–1950]                                       | 56,647<br>(57.2)        | 1,247<br>(46.3)                      | 177 (58.0)                                                             | 88 (68.1)                                        | 509 (52.8)                                                |
| ≥ 1950                                            | 3,011 (3.0)             | 53 (2.0)                             | 3 (1.0)                                                                | 2 (1.6)                                          | 16 (1.7)                                                  |
| Body mass index at Q1 (kg/m <sup>2</sup> )        | 22.6 (3.2)              | 23.2 (3.4)                           | 23.0 (2.9)                                                             | 22.9 (2.9)                                       | 23.0 (3.4)                                                |
| Smoking status                                    |                         |                                      |                                                                        |                                                  |                                                           |
| Not available                                     | 945 (1.0)               | 17 (0.6)                             | 0 (0)                                                                  | 0 (0)                                            | 7 (0.7)                                                   |
| Current smoker                                    | 14,755<br>(14.8)        | 420 (15.6)                           | 40 (13.1)                                                              | 16 (12.4)                                        | 158 (16.4)                                                |
| Non smoker                                        | 53,130<br>(53.7)        | 1,465<br>(54.4)                      | 176 (57.7)                                                             | 75 (58.1)                                        | 504 (52.3)                                                |
| Former smoker                                     | 30,165<br>(30.5)        | 790 (29.4)                           | 89 (29.2)                                                              | 38 (29.5)                                        | 295 (30.6)                                                |
| Passive smoking in childhood                      | 12,854<br>(13.0)        | 398 (14.8)                           | 48 (15.7)                                                              | 19 (14.7)                                        | 158 (16.4)                                                |
| Educational level                                 |                         |                                      |                                                                        |                                                  |                                                           |
| Not available                                     | 4,277 (4.3)             | 136 (5.1)                            | 14 (4.6)                                                               | 5 (3.9)                                          | 55 (5.7)                                                  |
| <High School                                      | 16,185<br>(16.4)        | 597 (22.2)                           | 61 (19.9)                                                              | 19 (14.7)                                        | 186 (19.3)                                                |
| Up to 2 years after high school                   | 44,986<br>(45.4)        | 1,186<br>(44.1)                      | 131 (43.0)                                                             | 57 (44.2)                                        | 432 (44.8)                                                |
| ≥3 years after high school                        | 33,547<br>(33.9)        | 773 (28.6)                           | 99 (32.5)                                                              | 48 (37.2)                                        | 291 (30.2)                                                |
| Socio-professional category                       |                         |                                      |                                                                        |                                                  |                                                           |
| Not available                                     | 15,800<br>(16.0)        | 337 (12.5)                           | 25 (8.2)                                                               | 11 (8.5)                                         | 106 (11.0)                                                |
| Teacher                                           | 62,013<br>(62.6)        | 1,632<br>(60.6)                      | 198 (64.9)                                                             | 86 (66.7)                                        | 609 (63.2)                                                |
| Higher managerial and<br>professional occupations | 2,499 (2.5)             | 83 (3.1)                             | 9 (3.0)                                                                | 3 (2.3)                                          | 28 (2.8)                                                  |
| Intermediate occupations                          | 15,340<br>(15.5)        | 495 (18.4)                           | 58 (19.0)                                                              | 27 (20.9)                                        | 179 (18.6)                                                |
| Unemployed                                        | 2,602 (2.6)             | 106 (3.9)                            | 10 (3.3)                                                               | 1 (0.8)                                          | 28 (2.8)                                                  |
| Other                                             | 741 (0.8)               | 39 (1.5)                             | 5 (1.6)                                                                | 1 (0.8)                                          | 14 (1.5)                                                  |
| Deprivation index                                 | -0.3 (1.0)              | -0.2 (1.0)                           | -0.1 (1.0)                                                             | -0.2 (0.9)                                       | -0.3 (1.1)                                                |

Results are presented as n (%) for categorical variables and mean (STD) for continuous variables. RA: rheumatoid arthritis.

### RA cases ascertainment: medical chart review

Mailings were sent to 2,924 of the eligible women (306 women could not be contacted because of death or withdrawn consent), with a recall letter for those who failed to answer. The specific IRD questionnaire was sent back by 2,182 eligible women (74.6%), including 1,833 women who self-reported RA (84%). Medical charts were sent by 594 women (20.3%). Among them, 195 (32.8%) could not be classified because of insufficient provided medical data and were therefore excluded from the performance study. Thus, 399 women provided sufficient medical data to ascertain their diagnosis. Among them, 129 (32.3%) were classified as RA cases, 60 (15.0%) as SpA cases, and 210 (52.6%) as having another diagnosis (*ie* osteoarthritis or other diagnosis). All 399 women completed the IRD questionnaire and had available medication reimbursement data on the MGEN database. The accuracy of the different diagnosis algorithms has been assessed on this subset of 399 women. Among the 399 women, 305 had self-declared RA. The demographic characteristics of these 305 women are described in Table 1.

### Determination of accuracy of self-reported diagnosis and validation algorithms

Accuracy of the validation algorithms compared to medical chart review is described in Table 2. Of the 305 women who self-reported RA with an available medical chart, only 125 (41 %) were confirmed by chart review, leading to a PPV and specificity of self-report of 41 and 33%, respectively. Concordance between self-reported RA alone and medical chart review was low (kappa statistic=0.2).

**Table 2. Agreement between self-reported rheumatic disease and medical chart review**

| Self-reported diagnosis | n    | Available medical chart, n | Confirmed cases, n | Agreement between self-report and medical chart review n (%) |
|-------------------------|------|----------------------------|--------------------|--------------------------------------------------------------|
| RA                      | 2692 | 305                        | 129                | 125 (41)                                                     |
| RA only                 | 2583 | 290                        | 129                | 122 (42)                                                     |
| SpA                     | 637  | 90                         | 60                 | 48 (53)                                                      |
| SpA only                | 528  | 75                         | 60                 | 42 (56)                                                      |
| RA and SpA              | 109  | 15                         | 0                  | 0 (0)                                                        |
| Total                   | 3230 | 399                        |                    |                                                              |

RA: rheumatoid arthritis; SpA: spondylarthritis.

1  
2  
3 The addition of the IRD questionnaire dramatically improved PPV and specificity (Table 3).  
4 When combining self-reported RA with the IRD questionnaire algorithm (any of the 4  
5 definitions), PPV was 72%, sensitivity 94% and specificity 83%, with a kappa statistic of 0.7.  
6  
7

8 The combination associated with the best performances (highest PPV, sensitivity and  
9 specificity) was self-reported RA plus use of any specific RA medication; the one with the  
10 lowest specificity was self-reported RA plus confirmation by a rheumatologist of another  
11 physician. The combinations of self-reported RA with the use of RA medication and the ACR  
12 criteria were specific but had the lowest sensitivities. Alternate diagnoses for the false positive  
13 cases detected by this algorithm are reported in Table 4.  
14  
15

16  
17  
18 Using medication reimbursement data from the MGEN database also improved PPV and  
19 sensitivities of self-report alone (Table 3). If women self-reported RA and had at least one  
20 reimbursement of any RA specific medication, PPV was 90%, sensitivity 71%, specificity  
21 87%, and kappa coefficient 0.7. With this algorithm, 10 women were detected by the  
22 medication reimbursement database but did not have RA (false positive cases, Table 4). All of  
23 them had received methotrexate. Also, 38 women were not detected by this algorithm but had  
24 RA (false negative): 21 received methotrexate before 2004, thus before the onset of the  
25 MGEN reimbursement database, 5 received intravenous biologic DMARDs not available in  
26 the database, and 27 received treatments which were not specific enough of RA (Table 5).  
27  
28

29 Combining self-report to both IRD questionnaire and medication reimbursement database  
30 improved PPV (98%) but considerably lowered sensitivity (67%), with no amelioration of the  
31 kappa value (Table 3).  
32  
33  
34  
35  
36  
37  
38  
39  
40  
41  
42  
43  
44  
45  
46  
47  
48  
49  
50  
51  
52  
53  
54  
55  
56  
57  
58  
59  
60

**Table 3. Agreement between self-report of RA alone, combined to the IRD questionnaire and to the medication reimbursement database with chart review**

|                                                                                  | Chart review (gold standard) |     |       | Positive Predictive Value, % | Negative Predictive Value, % | Sensitivity, % | Specificity, % | Kappa Coefficient (95% CI) |
|----------------------------------------------------------------------------------|------------------------------|-----|-------|------------------------------|------------------------------|----------------|----------------|----------------------------|
|                                                                                  | Yes                          | No  | Total |                              |                              |                |                |                            |
| <b>Self-report of RA</b>                                                         |                              |     |       |                              |                              |                |                |                            |
| Yes                                                                              | 125                          | 180 | 305   | 41.0                         | 95.7                         | 96.9           | 33.3           | 0.22 (0.17-0.28)           |
| No                                                                               | 4                            | 90  | 94    |                              |                              |                |                |                            |
| Total                                                                            | 129                          | 270 | 399   |                              |                              |                |                |                            |
| <b>Self-report of RA + IRD questionnaire</b>                                     |                              |     |       |                              |                              |                |                |                            |
| 1. Confirmation by a rheumatologist or an internal medicine specialist           |                              |     |       |                              |                              |                |                |                            |
| Yes                                                                              | 120                          | 43  | 166   | 72.3                         | 96.1                         | 93             | 83             | 0.71 (0.65-0.78)           |
| No                                                                               | 9                            | 224 | 233   |                              |                              |                |                |                            |
| Total                                                                            | 129                          | 270 | 399   |                              |                              |                |                |                            |
| 2. RA medication                                                                 |                              |     |       |                              |                              |                |                |                            |
| Yes                                                                              | 118                          | 11  | 129   | 91.5                         | 95.9                         | 91.5           | 95.9           | 0.87 (0.82-0.93)           |
| No                                                                               | 11                           | 259 | 270   |                              |                              |                |                |                            |
| Total                                                                            | 129                          | 270 | 399   |                              |                              |                |                |                            |
| 3. Positive RF and/or ACPA                                                       |                              |     |       |                              |                              |                |                |                            |
| Yes                                                                              | 72                           | 3   | 75    | 96.0                         | 82.4                         | 55.8           | 98.9           | 0.61 (0.53-0.70)           |
| No                                                                               | 57                           | 267 | 324   |                              |                              |                |                |                            |
| Total                                                                            | 129                          | 270 | 399   |                              |                              |                |                |                            |
| 4. ACR criteria                                                                  |                              |     |       |                              |                              |                |                |                            |
| Yes                                                                              | 63                           | 7   | 70    | 90.0                         | 79.9                         | 48.8           | 97.4           | 0.52 (0.43-0.61)           |
| No                                                                               | 66                           | 263 | 329   |                              |                              |                |                |                            |
| Total                                                                            | 129                          | 270 | 399   |                              |                              |                |                |                            |
| Any of these 4 definition                                                        |                              |     |       |                              |                              |                |                |                            |
| Yes                                                                              | 121                          | 47  | 168   | 72.0                         | 96.5                         | 93.8           | 82.6           | 0.71 (0.64-0.78)           |
| No                                                                               | 8                            | 223 | 231   |                              |                              |                |                |                            |
| Total                                                                            | 129                          | 270 | 399   |                              |                              |                |                |                            |
| <b>Self-report of RA + medication reimbursement database</b>                     |                              |     |       |                              |                              |                |                |                            |
| Yes                                                                              | 91                           | 10  | 101   | 90.1                         | 87.3                         | 70.5           | 87.3           | 0.71 (0.63-0.78)           |
| No                                                                               | 38                           | 260 | 298   |                              |                              |                |                |                            |
| Total                                                                            | 129                          | 270 | 399   |                              |                              |                |                |                            |
| <b>Self-report of RA + IRD questionnaire + medication reimbursement database</b> |                              |     |       |                              |                              |                |                |                            |
| Yes                                                                              | 86                           | 2   | 88    | 97.7                         | 86.2                         | 66.7           | 99.3           | 0.72 (0.64-0.79)           |
| No                                                                               | 43                           | 268 | 311   |                              |                              |                |                |                            |
| Total                                                                            | 129                          | 270 | 399   |                              |                              |                |                |                            |

RA: rheumatoid arthritis; IRD: inflammatory rheumatic disease; CI: confidence interval.

**Table 4. Alternate diagnoses for false positive cases detected by the algorithms**

|                                                                             | Alternate diagnosis                                                                                                                                                                                                 |
|-----------------------------------------------------------------------------|---------------------------------------------------------------------------------------------------------------------------------------------------------------------------------------------------------------------|
| False positive cases detected by self-report + IRD questionnaire, N=39      | Osteoarthritis (n=24)<br>Scapulohumeral periarthritis (n=5)<br>Polymyalgia rheumatica (n=3)<br>Primary Sjögren's syndrome (n=3)<br>Systemic lupus erythematosus (n=2)<br>Osteoporosis (n=1)<br>Lumbar sciatic (n=1) |
| False positive cases detected by self-report + reimbursement database, N=10 | Psoriatic arthritis (n=7)<br>Systemic lupus erythematosus (n=2)<br>Osteoarthritis associated with inflammatory bowel disease (n=1)                                                                                  |

IRD: inflammatory rheumatic disease

**Table 5. RA treatment of the 38 false negative RA cases not detected by the reimbursement database**

| Treatment             | N  |
|-----------------------|----|
| Methotrexate*         | 21 |
| Glucocorticoids alone | 8  |
| Hydroxychloroquine    | 14 |
| Sulfasalazine         | 5  |
| Infliximab            | 4  |
| Rituximab             | 1  |

\*Women received methotrexate before 2004, before the onset of the medication database

### Identification of RA cases in the E3N cohort

Finally, we used both algorithms to identify RA cases in our cohort. Among the 1,833 women who answered the IRD questionnaire and self-declared RA, 904 RA cases (49.3%) were confirmed by the algorithm based on the IRD questionnaire (self-reported RA and any of the 4 definitions). Among them we excluded the 47 (5.2%) false positive cases (based on medical chart review) and 34 (3.8%) RA cases without diagnosis date, thus not allowing to know whether they were incident or prevalent. Finally, 823 (44.9%) RA cases were identified by this algorithm. The second algorithm based on the MGEN reimbursement database was used on the 859 remaining eligible women who self-reported RA but did not answer the questionnaire, and identified 141 (16.4%) RA cases. Overall, 964 RA cases were detected by one of the two algorithms, including 698 incident cases and 266 prevalent cases, during a mean follow-up of 25.2 years (S2 Appendix). Demographical characteristics of the identified RA cases is shown in Table 1.



## DISCUSSION

In this large prospective cohort of French adult women, we examined the accuracy of self-reported diagnoses of RA and provided interesting information regarding the way to validate these diagnoses. As expected, in our study, the accuracy of self-reported diagnoses of RA was poor. But combining self-report to a specific IRD questionnaire providing additional self-reported data and/or to a medication reimbursement database, dramatically improved accuracy of RA diagnoses, with high sensitivity, specificity and PPV. Using these algorithms, we could detect nearly one thousand RA cases in this cohort.

The accuracy of self-reported RA diagnoses has previously been evaluated in other cohorts [7–9,12,13,15,23,24]. Reliability, sensitivity, and specificity of self-reported RA varied widely, depending on how the question was phrased, and on the confirmation method (diagnostic registries, chart review, use of ACR criteria, and/or clinical evaluation). When compared to chart review, PPV varies between 7 and 35% [8,9,15,24,30]. In the Nurses' Health Study [23], Karlson *et al* only confirmed 7% of the original self-reported RA, by reviewing the medical charts to look if women fulfilled the ACR criteria. In our cohort, self-reported diagnoses of RA were accurate for ~ 40% of the cases. Comparison with other studies, mainly involving English language questionnaires, might be difficult. Indeed, our higher rate of accurate diagnoses could be partially explained by language differences, RA and osteoarthritis being phonetically close in English, but not in French.

Nevertheless, this accuracy was not sufficient. Thus, to improve the accuracy of RA diagnosis, we used self-reported data from an IRD questionnaire, derived from a validated questionnaire designed to validate RA and SpA cases by phone interviews in a population of patients of 10 French university hospital rheumatology units [26]. We adapted it with the help of a patients' association that reviewed the wording and phrasing to make it clearly understandable to general population subjects, and we added questions about the presence or absence of RF and/or ACPA and on RA medication. Using this questionnaire, self-report of RA combined to a self-reported use of RA medication had the excellent accuracy, with both high sensitivity and specificity. Although very specific, and useful for further disease phenotyping, a self-report of positive RF and/or ACPA resulted in a low sensitivity and using this definition might miss RA cases. Using the ACR criteria in the IRD questionnaire resulted in a low sensitivity, because those criteria were not designed to be used in self-reported questionnaires, nevertheless they were highly specific. Our results demonstrate that the use of a limited list of items, particularly focusing on specific medications, in a dedicated questionnaire could improve drastically self-report accuracy.

1  
2  
3 We also assessed the performance of the algorithm using the medication reimbursement  
4 database. This method had been used to identify RA cases in the first study on RA in the E3N  
5 cohort study [28]. As expected, the algorithm has an excellent specificity and PPV, but  
6 underestimates the number of RA cases. Indeed, the database included all medications  
7 delivered by community-based pharmacies since 2004 and we only considered methotrexate,  
8 leflunomide, sub-cutaneous TNF- $\alpha$  inhibitors, and sub-cutaneous abatacept or tocilizumab;  
9 therefore we could not detect RA cases treated before 2004 and no longer treated with those  
10 drugs, those only treated by intravenous biologics delivered by hospital pharmacies only, and  
11 those with other treatments (e.g. hydroxychloroquine). Thus, if an exhaustive medication  
12 reimbursement database was available, using this algorithm could probably lead to both high  
13 specificities and high sensitivities.  
14

15  
16 Using both algorithms, we detected nearly one thousand RA cases, mainly incident cases.  
17 Although, there might be some false positive RA cases among them, given difficulties to  
18 ascertain RA cases in large epidemiologic studies, and the accuracy of the used algorithms to  
19 limit their number, this rate might be small.  
20

21  
22 We acknowledge some limitations to the present study. First, it was not designed to estimate  
23 the number of unreported RA cases in our cohort. Our population of non-cases were women  
24 who did not self-report RA but self-reported another IRD, which could bias our results.  
25 Ideally, we would have analyzed medical records from women who did not report any IRD to  
26 determine the proportion of cases missed. Thus, NPVs are reported but should be interpreted  
27 with caution. However, our main problematic here was not to miss cases but to ascertain those  
28 we detected. Nevertheless, for future epidemiologic study, having some RA cases in our  
29 control group might be a possibility, but the number of these cases is likely to be small, and,  
30 given the large number of non-cases in our cohort, the risk of bias induced by the false  
31 negative cases is negligible.  
32

33  
34 Another limit could be the representativeness of the sample of women who provided their  
35 medical records, sent on a voluntary basis, thus not at random, but it is unlikely that it would  
36 have biased our findings, this sample being similar to the rest of the women.  
37

38  
39 To conclude, our study highlights the poor accuracy of self-reported RA diagnoses, even  
40 among educated women. We demonstrated that this accuracy could be improved using  
41 medication reimbursement data and/or other self-reported data from a specific questionnaire.  
42 It appears that obtaining data on RA specific treatments either from patients themselves or  
43 from health insurance database is one of the best option. Even much less sensitive, obtaining  
44  
45  
46  
47  
48  
49  
50  
51  
52  
53  
54  
55  
56  
57  
58  
59  
60

1  
2  
3 confirmation of ACPA or RF positivity from patients was also highly specific, and offer the  
4 advantage of giving a key phenotypic characteristic, particularly important when studying RA  
5 risk factors. These algorithms can be used in large population-based cohort, sparing the  
6 difficulties of obtaining complete medical charts, and the time and cost of medical chart  
7 review. Our results could serve as an example for other teams that aim at ascertaining RA  
8 cases in large epidemiological studies. Also, the validation of almost 1.000 RA cases in our  
9 cohort will serve as a basis to future epidemiological studies, since the design and the long  
10 follow-up of participants of our cohort will be used to investigate many potential RA risk  
11 factors.  
12  
13  
14  
15  
16  
17  
18  
19  
20  
21  
22  
23  
24  
25  
26  
27  
28  
29  
30  
31  
32  
33  
34  
35  
36  
37  
38  
39  
40  
41  
42  
43  
44  
45  
46  
47  
48  
49  
50  
51  
52  
53  
54  
55  
56  
57  
58  
59  
60

For peer review only

## ACKNOWLEDGEMENTS

The authors are indebted to all participants for their continued participation. The authors would like to thank Pascale Gerbouin-Rerolle, Maxime Valdenaire and Roselyn Rima Gomes for their help on data management. They also acknowledge the AFPric patients' association that helped to review the wording and phrasing of the validation questionnaire, particularly Patricia Preiss and Angelique Hochodé.

## AUTHOR CONTRIBUTIONS

All authors contributed to the manuscript. YN, CS, ED, XM, MCB and RS were responsible for conception and design. YN, GG, MCB and RS were responsible for collection of data and analysis. All authors were responsible for the interpretation of data. YN and RS wrote the first version of the manuscript. All authors critically revised and approved the final version of the manuscript.

## FUNDING

The present work was performed using data from the Inserm E3N cohort and support from the MGEN, Gustave Roussy, and the *Ligue contre le Cancer* for setting up and maintaining the cohort. The study was also supported by a state grant ANR-10-COHO-0006 from the *Agence Nationale de la Recherche within the Investissement d'Avenir* program. In addition, this study was conducted thanks to the help of an unrestricted grant from the *Société Française de Rhumatologie*.

## ETHICAL APPROVAL INFORMATION

This study was approved by the French authorities (“Comité Consultatif sur le Traitement de l'information en matière de Recherche dans le domaine de la Santé” and “Commission Nationale de l'Informatique et des Libertés”). An informed consent was obtained from all patients.

## COMPETING INTERESTS

None of the authors declared any competing interest in link with the present study

## DATA SHARING

Data are available on demand by emailing the corresponding author.

## REFERENCES

- 1 Klareskog L, Padyukov L, Rönnelid J, *et al.* Genes, environment and immunity in the development of rheumatoid arthritis. *Curr Opin Immunol* 2006;**18**:650–5. doi:10.1016/j.coi.2006.06.004
- 2 Karlson EW, Chang S-C, Cui J, *et al.* Gene-environment interaction between HLA-DRB1 shared epitope and heavy cigarette smoking in predicting incident rheumatoid arthritis. *Ann Rheum Dis* 2010;**69**:54–60. doi:10.1136/ard.2008.102962
- 3 Linn-Rasker SP, van der Helm-van Mil AHM, van Gaalen FA, *et al.* Smoking is a risk factor for anti-CCP antibodies only in rheumatoid arthritis patients who carry HLA-DRB1 shared epitope alleles. *Ann Rheum Dis* 2006;**65**:366–71. doi:10.1136/ard.2005.041079
- 4 Lee H-S, Irigoyen P, Kern M, *et al.* Interaction between smoking, the shared epitope, and anti-cyclic citrullinated peptide: a mixed picture in three large North American rheumatoid arthritis cohorts. *Arthritis Rheum* 2007;**56**:1745–53. doi:10.1002/art.22703
- 5 Bang S-Y, Lee K-H, Cho S-K, *et al.* Smoking increases rheumatoid arthritis susceptibility in individuals carrying the HLA-DRB1 shared epitope, regardless of rheumatoid factor or anti-cyclic citrullinated peptide antibody status. *Arthritis Rheum* 2010;**62**:369–77. doi:10.1002/art.27272
- 6 Willemze A, van der Woude D, Ghiddey W, *et al.* The interaction between HLA shared epitope alleles and smoking and its contribution to autoimmunity against several citrullinated antigens. *Arthritis Rheum* 2011;**63**:1823–32. doi:10.1002/art.30409
- 7 Kvien TK, Glennås A, Knudsrød OG, *et al.* The validity of self-reported diagnosis of rheumatoid arthritis: results from a population survey followed by clinical examinations. *J Rheumatol* 1996;**23**:1866–71.
- 8 Star VL, Scott JC, Sherwin R, *et al.* Validity of self-reported rheumatoid arthritis in elderly women. *J Rheumatol* 1996;**23**:1862–5.
- 9 Ling SM, Fried LP, Garrett E, *et al.* The accuracy of self-report of physician diagnosed rheumatoid arthritis in moderately to severely disabled older women. Women's Health and Aging Collaborative Research Group. *J Rheumatol* 2000;**27**:1390–4.
- 10 Barlow JH, Turner AP, Wright CC. Comparison of clinical and self-reported diagnoses for participants on a community-based arthritis self-management programme. *Br J Rheumatol* 1998;**37**:985–7.
- 11 Cooper GS, Wither J, McKenzie T, *et al.* The prevalence and accuracy of self-reported history of 11 autoimmune diseases. *J Rheumatol* 2008;**35**:2001–4.
- 12 Walitt BT, Constantinescu F, Katz JD, *et al.* Validation of self-report of rheumatoid arthritis and systemic lupus erythematosus: The Women's Health Initiative. *J Rheumatol* 2008;**35**:811–8.
- 13 Formica MK, McAlindon TE, Lash TL, *et al.* Validity of self-reported rheumatoid arthritis in a large cohort: results from the Black Women's Health Study. *Arthritis Care Res* 2010;**62**:235–41. doi:10.1002/acr.20073

- 14 Gill TK, Hill CL. The Accuracy of Self-report in Rheumatic Diseases. *J Rheumatol* 2017;**44**:1109–11. doi:10.3899/jrheum.170564
- 15 Videm V, Thomas R, Brown MA, *et al.* Self-reported Diagnosis of Rheumatoid Arthritis or Ankylosing Spondylitis Has Low Accuracy: Data from the Nord-Trøndelag Health Study. *J Rheumatol* 2017;**44**:1134–41. doi:10.3899/jrheum.161396
- 16 O'Rourke JA, Ravichandran C, Howe YJ, *et al.* Accuracy of self-reported history of autoimmune disease: A pilot study. *PLoS One* 2019;**14**:e0216526. doi:10.1371/journal.pone.0216526
- 17 Linauskas A, Overvad K, Berg Johansen M, *et al.* Positive predictive value of first-time rheumatoid arthritis diagnoses and their serological subtypes in the Danish National Patient Registry. *Clin Epidemiol* 2018;**10**:1709–20. doi:10.2147/CLEP.S175406
- 18 Linauskas A, Overvad K, Symmons D, *et al.* Body Fat Percentage, Waist Circumference, and Obesity As Risk Factors for Rheumatoid Arthritis: A Danish Cohort Study. *Arthritis Care Res* 2019;**71**:777–86. doi:10.1002/acr.23694
- 19 Sundstrom B, Johansson I, Rantapaa-Dahlqvist S. Interaction between dietary sodium and smoking increases the risk for rheumatoid arthritis: results from a nested case-control study. *Rheumatology* 2015;**54**:487–93. doi:10.1093/rheumatology/keu330
- 20 Fisher BA, Cartwright AJ, Quirke A-M, *et al.* Smoking, Porphyromonas gingivalis and the immune response to citrullinated autoantigens before the clinical onset of rheumatoid arthritis in a Southern European nested case-control study. *BMC Musculoskelet Disord* 2015;**16**:331. doi:10.1186/s12891-015-0792-y
- 21 Muller S, Hider SL, Raza K, *et al.* An algorithm to identify rheumatoid arthritis in primary care: a Clinical Practice Research Datalink study. *BMJ Open* 2015;**5**:e009309. doi:10.1136/bmjopen-2015-009309
- 22 Singh JA, Holmgren AR, Noorbaloochi S. Accuracy of Veterans Administration databases for a diagnosis of rheumatoid arthritis. *Arthritis Rheum* 2004;**51**:952–7. doi:10.1002/art.20827
- 23 Karlson Elizabeth W., Mandl Lisa A., Hankinson Susan E., *et al.* Do breast-feeding and other reproductive factors influence future risk of rheumatoid arthritis?: Results from the Nurses' Health Study. *Arthritis Rheum* 2004;**50**:3458–67. doi:10.1002/art.20621
- 24 Mikuls TR, Cerhan JR, Criswell LA, *et al.* Coffee, tea, and caffeine consumption and risk of rheumatoid arthritis: results from the Iowa Women's Health Study. *Arthritis Rheum* 2002;**46**:83–91. doi:10.1002/1529-0131(200201)46:1<83::AID-ART10042>3.0.CO;2-D
- 25 Clavel-Chapelon F, van Liere MJ, Giubout C, *et al.* E3N, a French cohort study on cancer risk factors. E3N Group. Etude Epidémiologique auprès de femmes de l'Education Nationale. *Eur J Cancer Prev Off J Eur Cancer Prev Organ ECP* 1997;**6**:473–8.
- 26 Guillemin F, Saraux A, Fardellone P, *et al.* Detection of cases of inflammatory rheumatic disorders: performance of a telephone questionnaire designed for use by patient interviewers. *Ann Rheum Dis* 2003;**62**:957–63. doi:10.1136/ard.62.10.957

- 1  
2  
3 27 Arnett FC, Edworthy SM, Bloch DA, *et al.* The american rheumatism association 1987  
4 revised criteria for the classification of rheumatoid arthritis. *Arthritis Rheum*;31:315–24.  
5 doi:10.1002/art.1780310302  
6  
7  
8 28 Seror R, Henry J, Gusto G, *et al.* Passive smoking in childhood increases the risk of  
9 developing rheumatoid arthritis. *Rheumatology* 2019;58:1154–62.  
10 doi:10.1093/rheumatology/key219  
11  
12 29 Aletaha D, Neogi T, Silman AJ, *et al.* 2010 rheumatoid arthritis classification criteria: an  
13 American College of Rheumatology/European League Against Rheumatism collaborative  
14 initiative. *Ann Rheum Dis* 2010;69:1580–8. doi:10.1136/ard.2010.138461  
15  
16 30 Karlson E, Sanchez-Guerrero J, Wright EA, *et al.* A connective tissue disease screening  
17 questionnaire for population studies. *Ann Epidemiol* 1995;5:297–302. doi:10.1016/1047-  
18 2797(94)00096-C  
19  
20  
21  
22  
23  
24  
25  
26  
27  
28  
29  
30  
31  
32  
33  
34  
35  
36  
37  
38  
39  
40  
41  
42  
43  
44  
45  
46  
47  
48  
49  
50  
51  
52  
53  
54  
55  
56  
57  
58  
59  
60



**S1 Appendix. Specific IRD questionnaire, adapted from Guillemin et al. [25].**

Subjects are asked to answer “yes” or “no” to the following questions:

Q0. Do you confirm having one of these rheumatic disorders?

Q1. Which was your rheumatic disease?

- Rheumatoid arthritis?
- Spondyloarthritis / axial spondyloarthritis and/or peripheral spondyloarthritis (formerly called ankylosing spondyloarthritis)?
- Psoriatic arthritis?
- Other: please precise

Q2. Was this diagnosis confirmed by a physician? If “yes”, which one?

- Rheumatologist
- General practitioner
- Internist
- Other

Q3. What was the date of diagnosis?

Q4. What was the date of first symptoms?

Q5. Do you have full reimbursement for health care for this disease (*ALD – Affection longue durée*)?

**Concerning your joint pain:**

Q6. Are you at present experiencing, or have you in the past experienced, pains in your joints more than 2 weeks in a row (hands, wrists, feet, shoulder, elbows, knees)?

Q7. Are your joints swollen or have they been in the past?

Q8. Are or were your joints symmetrically affected, that is to say about the same on each side? (both hands, or both feet for example)

Q9. Are or were your hands affected?

Q10. Are or were your lower limbs affected (that is to say, your groin, your hip joint, your knees, your ankles, or your feet)?

Q11. Are or were more than three joints affected?

Q12. Has the pain lasted or did it last more than six weeks?

Q13. Have you ever been woken up by joint pain?

Q14. Are or were your joints stiff in the morning?

If Yes: For about how many minutes?

- < 30 minutes



- 1  
2  
3  30 minutes to 1 hour  
4  > 1 hour  
5

6 Q15. Have you or have you had nodules under the skin on your elbows or hands?  
7

8 Q16. Have you had the rheumatoid factor test, sometimes called the latex test or the Waaler-  
9 Rose test? If "yes": Do you know if it was positive?  
10

11 Q17. Have you had the anti CCP test, sometimes called ACPA test? If "yes": Do you know if  
12 it was positive?  
13

14 Q18. Have you had anti-illagrin antibody test or anti-keratin antibody test? If "yes": Do you  
15 know if it was positive?  
16

17 Q19. Have you had x ray examinations of your hands and wrists?  
18  
19

20  
21  
22 *[Q20 to Q33: specific questions for axial spondyloarthritis and/or psoriatic rheumatism]*  
23  
24

25 Q34. Among the following treatment, which one(s) do or did you receive for your disease?  
26

- 27  methotrexate (Novatrex®, Imeth®, Metoject®)  
28  leflunomide (Arava®)  
29  sulfasalazine (Salazopyrine®)  
30  hydroxychloroquine (Plaquenil®)  
31  azathioprine (Imurel®)  
32  gold salts, aurothiopropansulfonate (Allochrysine®, Auranofin®)  
33  ciclosporine (Neoral®)  
34  D-penicillamine (Trolovol®)  
35  tiopronine (Acadione®)  
36  Anakinra (Kineret®)  
37  infliximab (Remicade®, Inflectra®, Remsima®)  
38  etanercept (Enbrel®, Benepali®)  
39  adalimumab (Humira®)  
40  certolizumab (Cimzia®)  
41  golimumab (Simponi®)  
42  abatacept (Orencia®)  
43  tocilizumab (Roactemra®)  
44  rituximab (Mabthera)  
45  
46  
47  
48  
49  
50  
51  
52  
53  
54  
55  
56  
57  
58  
59  
60

**S2 Appendix. Flow chart of the identification of RA cases in the E3N cohort.**

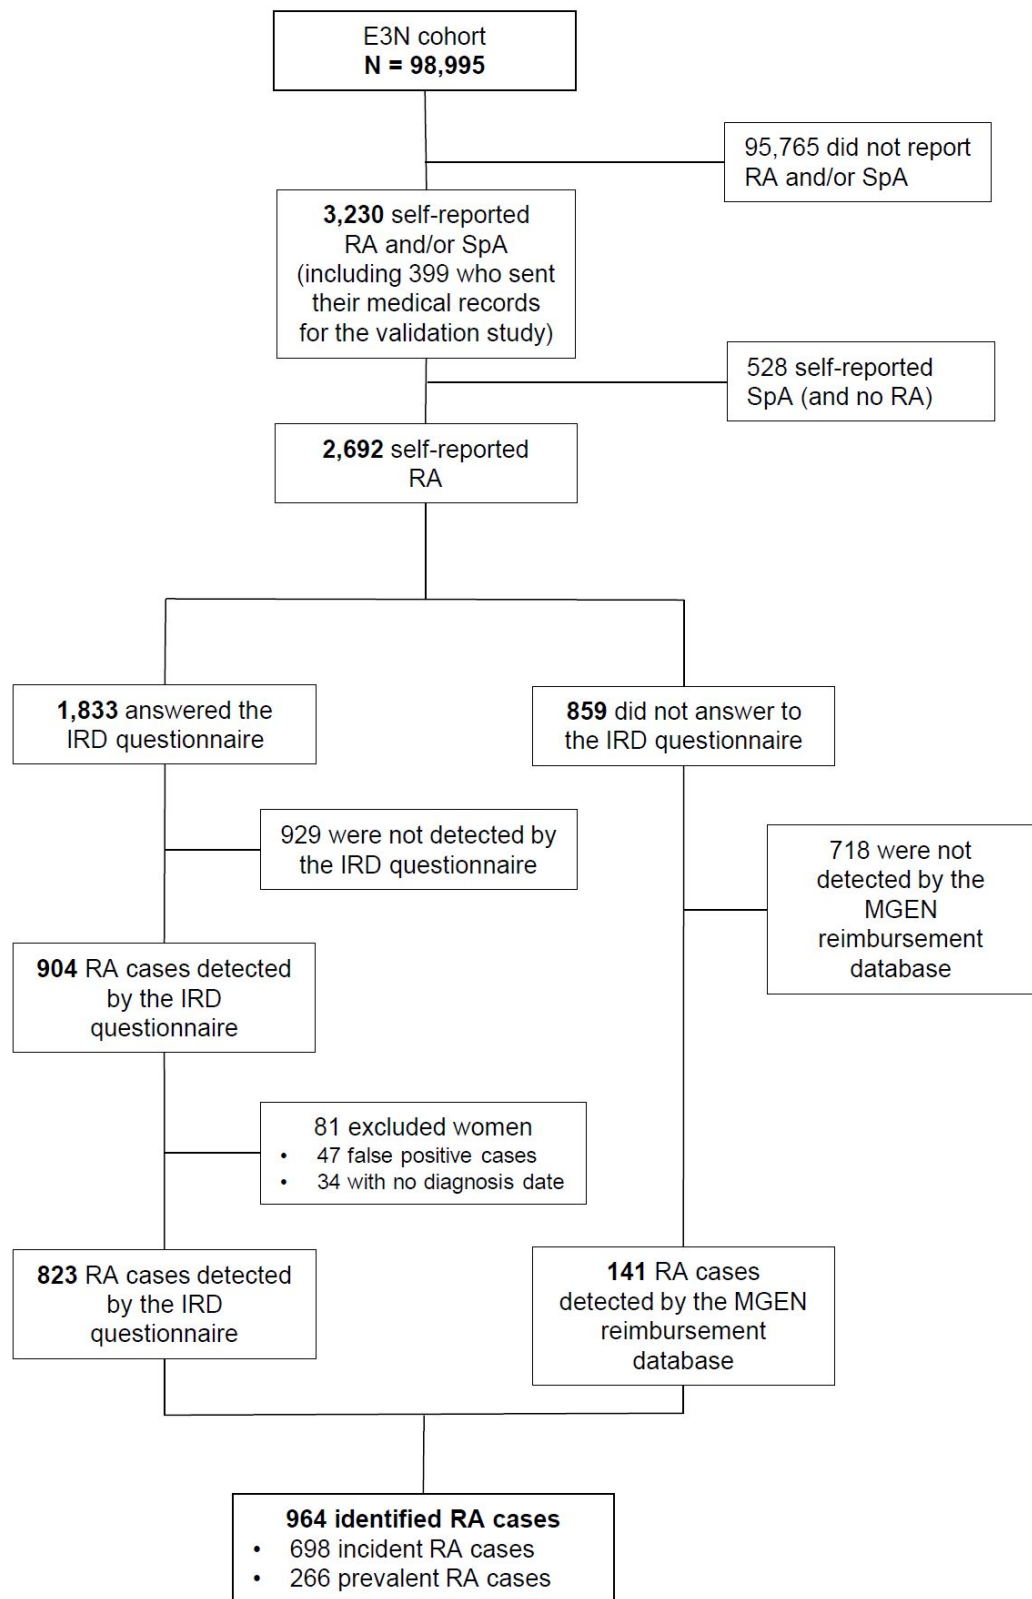

E3N: “Etude Epidémiologique auprès des femmes de la Mutuelle générale de l’Education Nationale”; RA: rheumatoid arthritis; SpA: spondylarthritis; IRD: inflammatory rheumatic disease; MGEN: “Mutuelle Générale de l’Education Nationale”.

# BMJ Open

## Improving Accuracy of Self-Reported Diagnoses of Rheumatoid Arthritis in the French Prospective E3N-EPIC cohort: A Validation Study

|                                 |                                                                                                                                                                                                                                                                                                                                                                                                                                                                                                                                                                                                                                                                                                                                                                                                                                                                                                                                                                                                                     |
|---------------------------------|---------------------------------------------------------------------------------------------------------------------------------------------------------------------------------------------------------------------------------------------------------------------------------------------------------------------------------------------------------------------------------------------------------------------------------------------------------------------------------------------------------------------------------------------------------------------------------------------------------------------------------------------------------------------------------------------------------------------------------------------------------------------------------------------------------------------------------------------------------------------------------------------------------------------------------------------------------------------------------------------------------------------|
| Journal:                        | <i>BMJ Open</i>                                                                                                                                                                                                                                                                                                                                                                                                                                                                                                                                                                                                                                                                                                                                                                                                                                                                                                                                                                                                     |
| Manuscript ID                   | bmjopen-2019-033536.R1                                                                                                                                                                                                                                                                                                                                                                                                                                                                                                                                                                                                                                                                                                                                                                                                                                                                                                                                                                                              |
| Article Type:                   | Original research                                                                                                                                                                                                                                                                                                                                                                                                                                                                                                                                                                                                                                                                                                                                                                                                                                                                                                                                                                                                   |
| Date Submitted by the Author:   | 03-Oct-2019                                                                                                                                                                                                                                                                                                                                                                                                                                                                                                                                                                                                                                                                                                                                                                                                                                                                                                                                                                                                         |
| Complete List of Authors:       | Nguyen, Yann; CESP, INSERM U1018, Université Paris-Saclay, Université Paris-Sud Villejuif; Hôpital Bicêtre, Rheumatology<br>Salliot, C; Regional Hospital Centre Orleans La Source Hospital, Rheumatology; CESP, INSERM U1018, Université Paris-Saclay, Université Paris-Sud Villejuif<br>Gusto, Gaëlle; CESP, INSERM U1018, Université Paris-Saclay, Université Paris-Sud Villejuif<br>Descamps, Elise; CESP, INSERM U1018, Université Paris-Saclay, Université Paris-Sud Villejuif<br>Mariette, Xavier; Hôpital Bicêtre, Rheumatology; Center for Immunology of Viral Infections and Auto-immune Diseases (IMVA), INSERM U1184, Université Paris-Saclay, Université Paris-Sud<br>Boutron-Ruault, Marie-Christine; CESP, INSERM U1018, Université Paris-Saclay, Université Paris-Sud Villejuif; Gustave Roussy Institute<br>Seror, Raphaële; Hôpital Bicêtre, Rheumatology; Center for Immunology of Viral Infections and Auto-immune Diseases (IMVA), INSERM U1184, Université Paris-Saclay, Université Paris-Sud |
| <b>Primary Subject Heading</b>: | Rheumatology                                                                                                                                                                                                                                                                                                                                                                                                                                                                                                                                                                                                                                                                                                                                                                                                                                                                                                                                                                                                        |
| Secondary Subject Heading:      | Epidemiology                                                                                                                                                                                                                                                                                                                                                                                                                                                                                                                                                                                                                                                                                                                                                                                                                                                                                                                                                                                                        |
| Keywords:                       | rheumatoid arthritis, self-report, cohort, risk factors, accuracy, EPIDEMIOLOGY                                                                                                                                                                                                                                                                                                                                                                                                                                                                                                                                                                                                                                                                                                                                                                                                                                                                                                                                     |
|                                 |                                                                                                                                                                                                                                                                                                                                                                                                                                                                                                                                                                                                                                                                                                                                                                                                                                                                                                                                                                                                                     |

SCHOLARONE™  
Manuscripts

1  
2  
3 **Improving Accuracy of Self-Reported Diagnoses of Rheumatoid Arthritis in the French**  
4 **Prospective E3N-EPIC cohort: A Validation Study**

5 Yann Nguyen<sup>1,2</sup> MD, MPH, Carine Salliot<sup>1,3</sup> MD, MPH, Gaëlle Gusto<sup>1,4</sup> PhD, Elise  
6 Descamps<sup>2</sup> MD, MPH, Xavier Mariette<sup>2,5</sup> MD, PhD, Marie-Christine Boutron-Ruault<sup>1,4</sup><sup>¶</sup> MD,  
7 PhD, Raphaële Seror<sup>2,5</sup><sup>¶</sup> MD, PhD

8  
9  
10  
11 \*Corresponding author

12  
13 <sup>¶</sup>These authors equally contributed to this work  
14  
15  
16

17 **Affiliations:**

18  
19 <sup>1</sup>Centre for Research in Epidemiology and Population Health, (CESP), Institut pour la Santé et  
20 la Recherche Médicale (INSERM) U1018, Université Paris-Saclay, Université Paris-Sud,  
21 Villejuif, France

22  
23  
24 <sup>2</sup>Department of Rheumatology, Assistance Publique-Hôpitaux de Paris (AP-HP), Hôpitaux  
25 universitaires Paris-Sud – Hôpital Bicêtre, Le Kremlin Bicêtre, France

26  
27 <sup>3</sup>Department of Rheumatology, Centre Hospitalier Régional d'Orléans, Orléans, France

28  
29 <sup>4</sup>Gustave Roussy Institute, Villejuif, France

30  
31 <sup>5</sup>Université Paris-Sud, Center for Immunology of Viral Infections and Auto-immune Diseases  
32 (IMVA), Institut pour la Santé et la Recherche Médicale (INSERM) UMR 1184, Université  
33 Paris-Saclay, Le Kremlin Bicêtre, France  
34  
35  
36

37 **Correspondence:**

38  
39 Dr Marie-Christine Boutron-Ruault, Inserm U1018, Health across Generations Team, EMT,  
40 Institut Gustave Roussy, 114 rue Edouard Vaillant, 94805 Villejuif Cedex, France

41  
42 Tel +33 1 42 11 64 66, Fax: +33 1 42 11 40 00.

43  
44 Email: [marie-christine.boutron@gustaveroussy.fr](mailto:marie-christine.boutron@gustaveroussy.fr)  
45  
46  
47

48 **Word count**

49 Abstract: 256; Manuscript: 3769  
50  
51  
52

53 **Key words:**

54 Rheumatoid arthritis; self-report; epidemiology; cohort studies; risk factors  
55  
56  
57  
58  
59  
60

## ABSTRACT

### Objectives

The French E3N-EPIC cohort enrolled 98,995 women aged 40–65 years at inclusion since 1990 to study the main risk factors for cancer and severe chronic conditions in women. They were prospectively followed with biennially self-administered questionnaires collecting self-reported medical, environmental, and lifestyle data. Our objective was to assess the accuracy of self-reported diagnoses of rheumatoid arthritis (RA) and to devise algorithms to improve the ascertainment of RA cases in our cohort.

### Design

A validation study.

### Participants

Women who self-reported an inflammatory rheumatic disease (IRD) were asked to provide access to their medical record, and to answer an IRD questionnaire. Medical records were independently reviewed.

### Primary and secondary outcome measures

Positive predictive values (PPV) of self-reported RA alone, then coupled with the IRD questionnaire, and with a medication reimbursement database were assessed. These algorithms were then applied to the whole cohort to ascertain RA cases.

### Results

Of the 98,995 participants, 2692 self-reported RA. Medical records were available for a sample of 399 participants, including 305 who self-reported RA. Self-reported RA was accurate only for 42% participants. Combining self-reported diagnoses to answers to a specific IRD questionnaire or to the medication reimbursement database improved the PPV (75.6% and 90.1%, respectively). Using the devised algorithms, we could identify 964 RA cases in our cohort.

### Conclusion

Accuracy of self-reported RA is poor but adding answers to a specific questionnaire or data from a medication reimbursement database performed satisfactorily to identify RA cases in our cohort. It will subsequently allow investigating many potential risk factors of RA in women.

## ARTICLE SUMMARY

### Strengths and limitations of this study

- Two algorithms were devised and tested to improve accuracy of self-reported diagnosis of rheumatoid arthritis in a large population-based cohort.
- A large sample of medical records was available and independently reviewed to test the devised algorithm.
- Nearly a thousand cases of rheumatoid arthritis were identified, which will subsequently allow investigating many potential risk factors of rheumatoid arthritis in this cohort.
- The control population was women who self-reported another rheumatic disease and not healthy women.
- The sample of medical records was not provided at random.

## INTRODUCTION

Rheumatoid arthritis (RA) is the most common autoimmune inflammatory rheumatic disease (IRD) in adults, and is a major cause of functional alteration and handicap. RA is a complex multifactorial autoimmune disease in which both genetic and environmental factors interact in the pathogenesis of the disease to trigger auto-immunity.[1]

Little is known about environmental factors that may contribute to the disease, except smoking, which has been reproducibly reported as associated with an increased risk of anti-citrullinated protein autoantibody (ACPA)-positive RA, particularly in individuals carrying the HLA-DRB1-shared epitope alleles.[2–6] The role of other environmental factors has been suggested but results were rarely reproducible. Only epidemiological studies, such as case-control studies or cohort studies can appropriately address the question. The main advantage of case-control studies is that cases are easily ascertained, with detailed phenotypes and easy availability of biological data, but their main limits are a retrospective collection of environmental factors, the risk of hindsight and recall bias, and a potentially biased control population. Cohort studies offer the advantage of having a prospective collection of environmental factors before disease onset and a non-biased non-cases population. However, collected information about disease phenotypes is usually limited, and in large population-based cohorts, diagnoses are often self-reported.

The diagnostic accuracy of self-reported RA has been studied in various populations, and varies considerably, between 7 and 96%.[7–15] One of the evocated reasons is the confusion between RA and other forms of arthritis, mainly osteoarthritis (OA), the prevalence of which being higher than RA in general populations.[16] If the accuracy of self-reported diagnosis is poor, using self-reported RA alone as case definition might create an ascertainment bias, because of the high rate of false positive cases.

To overcome this lack of accuracy, some studies have used a linkage with national patient registries, primary health care records and/or hospital discharge databases usually based on International Classification of Diseases (ICD) codes.[17–21] However, such registries are not always available, and these methods can also lack specificity.[22] Other studies have ascertained self-reported RA through linkage with a medical record review, or even with clinical examination of all suspected cases.[23–25] However, in large cohorts, medical record screening is time-consuming, expensive, and subject to difficulties in obtaining patients' consents and medical charts.[12] These difficulties underscore the need for increasing accuracy of RA case definition based on self-reported and/or other available information.

1  
2  
3 Our primary objective was to evaluate the accuracy of self-reported diagnoses of RA in  
4 a French population-based cohort and to determine if the use of additional information obtained  
5 from a dedicated questionnaire and from a medication reimbursement database could improve  
6 their accuracy. A secondary objective was to use the devised algorithms to identify RA cases  
7 in this large cohort for subsequent epidemiological studies.  
8  
9  
10  
11  
12

## 13 MATERIAL AND METHODS

### 14 15 16 17 **The E3N-EPIC cohort study**

18 The E3N cohort study (*Etude Epidémiologique auprès des femmes de la Mutuelle générale de*  
19 *l'Education Nationale*) is a French prospective cohort study including 98,995 women living in  
20 France and covered by a national health insurance scheme primarily involving teachers.[26]  
21 This study is also the French component of the European Prospective Investigation into Cancer  
22 and Nutrition (EPIC). It was initiated in France in 1990 to study the main risk factors for cancer  
23 and severe chronic conditions in women. Participants ages were 40 to 65 at inclusion. After the  
24 baseline questionnaire (Q1), participants were biennially mailed questionnaires (Q2 to Q12) to  
25 update their health-related information and newly diagnosed diseases. The last questionnaire to  
26 date (Q12) was sent in 2018, but corresponding data are not yet available. In addition, a drug-  
27 reimbursement claims database has been available since 2004 for all cohort women from their  
28 medical insurance records (*Mutuelle Générale de l'Éducation Nationale* [MGEN]). The  
29 average follow-up rate per questionnaire has been 83% and, overall, the total proportion of  
30 patients lost to follow-up since 1990 was < 3% in 2014. All women gave written informed  
31 consent, and approvals were obtained from the French National Commission for Data  
32 Protection and Individual Freedom (327346-V14) and the French Advisory Committee on  
33 Information Processing in Material Research in the Field of Health (13.794).  
34  
35  
36  
37  
38  
39  
40  
41  
42  
43  
44  
45  
46  
47

### 48 **Participants**

49 In three follow-up questionnaires (Q9, Q10, and Q11, sent in 2007, 2011, and 2014,  
50 respectively), study participants self-reported a diagnosis of IRD (RA and/or spondyloarthritis  
51 [SpA]) by answering the following questions: “Do you have RA?” (yes/no) at Q9, Q10, and  
52 Q11, and “Do you have ankylosing spondylitis” (yes/no) at Q10 and Q11, together with the  
53 date of IRD diagnosis. In addition, women were asked at each questionnaire from baseline if  
54 they had been hospitalized since the last questionnaire, and if so, they had to specify the reasons  
55 for those admissions. All women who self-reported RA or SpA in questionnaires and/or in  
56  
57  
58  
59  
60



1  
2  
3 hospitalization reasons were eligible to participate in the validation study, those who self-  
4 reported SpA serving as a control population.  
5  
6  
7

### 8 **IRD questionnaire design**

9  
10 A specific IRD questionnaire was designed to ascertain diagnoses of RA and SpA (online  
11 supplementary appendix 1). The questionnaire was adapted from a telephone questionnaire  
12 designed by Guillemin *et al*, with reference to the signs, symptoms, and epidemiological criteria  
13 for RA (American College of Rheumatology 1987).[27,28] In this IRD questionnaire, women  
14 had the possibility to confirm or retract their self-reported diagnosis (online supplementary  
15 appendix 1, Q0, Q1). We included additional questions: if a physician confirmed the diagnosis  
16 (only a general practitioner, a rheumatologist, and/or an internist), date of diagnosis, date of  
17 first symptoms, presence of ACPA, and current and past treatments.  
18  
19  
20  
21  
22  
23

24 All eligible women were sent this specific IRD questionnaire with an information letter  
25 and were asked to send back the questionnaire and their medical chart comprising all relevant  
26 medical documents in relation with their rheumatic condition, including medical reports,  
27 laboratory findings, hand and foot radiographs, and results of rheumatoid factors (RF) and anti-  
28 citrullinated protein antibodies (ACPA) testing, when available. A first mailing was sent on  
29 June 2017, and a reminder was sent in December 2017 to those who did not answer the first  
30 one.  
31  
32  
33  
34  
35  
36

### 37 **RA ascertainment algorithm from IRD questionnaire**

38  
39 Based on data from the IRD questionnaire, a decision algorithm aimed at improving the  
40 accuracy of self-reported RA was devised by a consensus of rheumatologists (RS, XM, and  
41 ED). We considered as RA cases women who confirmed having RA in the IRD specific  
42 questionnaire, and self-reported at least one of the following: 1) RA diagnosis confirmed by a  
43 rheumatologist and/or another physician (internal medicine specialist or general practitioner)  
44 2) taking or having taken any of the RA conventional synthetic disease modifying anti-  
45 rheumatic drugs (DMARDs) or biologic DMARDs (listed in online supplementary appendix 1,  
46 Question 34), 3) having positive RF or ACPA, or 4) at least 4 of the seven 1987-ACR criteria  
47 (listed in online supplementary appendix 1, Questions 8,9,11,14–18).  
48  
49  
50  
51  
52  
53  
54  
55

### 56 **RA ascertainment algorithm from medication reimbursement database**

57  
58 The MGEN medication reimbursement database included, for all E3N participants, all  
59 medications delivered by community-based pharmacies since 2004. Thus, medications only  
60

1  
2  
3 delivered by hospital pharmacies (*ie* intravenous infusions), and medications used before 2004  
4 were not available.  
5

6 Using this medication reimbursement database, we devised a second algorithm: women  
7 were considered as RA cases if they self-reported having RA, and had had reimbursements for  
8 any conventional synthetic or biologic DMARD used in the treatment of RA, including  
9 methotrexate, leflunomide, any sub-cutaneous tumor necrosis factor alpha (TNF- $\alpha$ ) inhibitor,  
10 and sub-cutaneous abatacept or tocilizumab. Oral steroids, being widely used for other reasons,  
11 were not considered specific enough to be included in this definition. This algorithm had been  
12 previously used to ascertain RA cases in our cohort.[29] All algorithms are reported in detail in  
13 online supplementary table S1.  
14  
15  
16  
17  
18  
19  
20  
21

### 22 **RA cases ascertainment: medical chart review**

23 Medical records were obtained from the IRD questionnaire mailing for a subset of women and  
24 included medical reports from hospitalization and/or from outpatient medical visits, laboratory  
25 findings and/or bone X-rays. They were independently reviewed by 2 trained rheumatologists  
26 (YN and RS), blinded to the self-reported diagnoses and confirmed cases or not according to  
27 the RA identification algorithm. Classification was based on reviewer's expertise, and not on  
28 strict American college of rheumatology (ACR) 1987 criteria or ACR/European League against  
29 Rheumatism (EULAR) 2010 criteria,[28,30] and was used as the reference to assess the  
30 accuracy of self-reported diagnosis of RA alone and associated with additional information  
31 from the specific IRD questionnaire and from the medication reimbursement database. If the  
32 provided medical data were enough to confirm a diagnosis, reviewers classified women as RA,  
33 or not RA (including alternate diagnoses, such as OA, SpA, or other). Disagreements between  
34 the 2 reviewers were resolved by consensus. If diagnosis could not be ascertained by medical  
35 chart review, cases were considered as uncertain and were not used to determine the accuracy  
36 of the algorithms.  
37  
38  
39  
40  
41  
42  
43  
44  
45  
46  
47  
48  
49

### 50 **Identification of RA cases in the E3N cohort**

51 Since, we expected that the accuracy of self-reported RA diagnoses alone would not be  
52 sufficient, we used the devised algorithms to identify RA cases in our cohort (including women  
53 who did not provide their medical records). For women who answered the IRD questionnaire,  
54 we used the algorithm based on this questionnaire, and for those who self-reported RA in Q9,  
55 Q10, and/or Q11 but did not answer the specific IRD questionnaire, were deceased or lost to  
56 follow-up, we subsequently used the algorithm based on the medication reimbursement  
57  
58  
59  
60

1  
2  
3 database. Women with available medical record who were identified as RA cases by these  
4 algorithms were reassessed as non-cases if their diagnosis was invalidated by medical chart  
5 review (false positive cases).  
6  
7  
8  
9

### 10 **Statistical analysis**

11 To assess the accuracy of self-reported diagnosis alone, and the two algorithms based on the  
12 IRD questionnaire and/or the medication reimbursement database, we used the classification  
13 based on medical chart review as the reference standard. Thus, this assessment was performed  
14 on the subset of participants with an available medical chart and for whom its review allowed  
15 to classify them as case or non-case. The level of agreement between each algorithm and the  
16 chart review diagnoses was assessed by the kappa statistic with 95% confidence intervals.  
17 Positive predictive value (PPV) and negative predictive value (NPV), sensitivity and specificity  
18 of each algorithm were calculated.  
19  
20  
21  
22  
23  
24

25 Finally, a descriptive analysis of demographic characteristics was performed on all  
26 women enrolled in the E3N study, on women who self-reported RA, on those who self-reported  
27 RA and provided their medical charts, on chart-reviewed confirmed RA, and on RA cases  
28 identified by combining self-report to the IRD questionnaire and/or the medication  
29 reimbursement database. All analyses were carried out using the SAS software, version 9.4  
30 (SAS Institute Inc., Cary, North Carolina, USA).  
31  
32  
33  
34  
35  
36  
37

### 38 **Patient and Public Involvement**

39 Patients and/or the public were involved in this validation study. Our validation study relied on  
40 a self-completed patient questionnaire adapted from a previous questionnaire not designed to  
41 be sent by mail. We modified the questionnaire for this purpose and added some questions on  
42 X-rays, and on ACPA and RF testing. To make sure that the revised questionnaire could be  
43 clearly understandable by patients, a patients' association (Association Française des  
44 Polyarthrites et rhumatismes inflammatoires chroniques [AFPric]) helped us to review the  
45 contents and wording of the questionnaire. The findings from this study will be shared with  
46 E3N participants through the next newsletter.  
47  
48  
49  
50  
51  
52  
53  
54  
55  
56  
57  
58  
59  
60

## RESULTS

### IRD case identification

Among the 98,995 participants, 3,230 women self-reported RA and/or SpA and were eligible to participate in the validation study: 2,692 self-reported RA, 637 self-reported SpA, and 109 women self-reported both RA and SpA. Demographic characteristics of the whole cohort, and of women who self-reported RA is described in Table 1.

**Table 1. Baseline characteristics of the study population**

|                                                | All women     | Self-reported RA | Self-reported RA with available medical records | Confirmed RA after chart review | Identified RA with devised algorithms |
|------------------------------------------------|---------------|------------------|-------------------------------------------------|---------------------------------|---------------------------------------|
| N                                              | (N=98,995)    | (N=2,692)        | (N=305)                                         | (N=129)                         | (N=964)                               |
| Age at Q1 (years)                              | 49.4 (6.7)    | 51.1 (6.7)       | 49.6 (5.6)                                      | 48.5 (5.2)                      | 50.2 (6.3)                            |
| Year of birth                                  |               |                  |                                                 |                                 |                                       |
| < 1930                                         | 7,808 (7.9)   | 278 (10.3)       | 13 (4.3)                                        | 2 (1.6)                         | 59 (6.1)                              |
| [1930–1940]                                    | 31,529 (31.9) | 1,114 (41.4)     | 112 (36.7)                                      | 37 (28.7)                       | 380 (39.4)                            |
| [1940–1950]                                    | 56,647 (57.2) | 1,247 (46.3)     | 177 (58.0)                                      | 88 (68.1)                       | 509 (52.8)                            |
| ≥ 1950                                         | 3,011 (3.0)   | 53 (2.0)         | 3 (1.0)                                         | 2 (1.6)                         | 16 (1.7)                              |
| Body mass index at Q1 (kg/m <sup>2</sup> )     | 22.6 (3.2)    | 23.2 (3.4)       | 23.0 (2.9)                                      | 22.9 (2.9)                      | 23.0 (3.4)                            |
| Smoking status                                 |               |                  |                                                 |                                 |                                       |
| Not available                                  | 945 (1.0)     | 17 (0.6)         | 0 (0)                                           | 0 (0)                           | 7 (0.7)                               |
| Current smoker                                 | 14,755 (14.8) | 420 (15.6)       | 40 (13.1)                                       | 16 (12.4)                       | 158 (16.4)                            |
| Non smoker                                     | 53,130 (53.7) | 1,465 (54.4)     | 176 (57.7)                                      | 75 (58.1)                       | 504 (52.3)                            |
| Former smoker                                  | 30,165 (30.5) | 790 (29.4)       | 89 (29.2)                                       | 38 (29.5)                       | 295 (30.6)                            |
| Passive smoking in childhood                   | 12,854 (13.0) | 398 (14.8)       | 48 (15.7)                                       | 19 (14.7)                       | 158 (16.4)                            |
| Education level                                |               |                  |                                                 |                                 |                                       |
| Not available                                  | 4,277 (4.3)   | 136 (5.1)        | 14 (4.6)                                        | 5 (3.9)                         | 55 (5.7)                              |
| <High School                                   | 16,185 (16.4) | 597 (22.2)       | 61 (19.9)                                       | 19 (14.7)                       | 186 (19.3)                            |
| Up to 2 years after high school                | 44,986 (45.4) | 1,186 (44.1)     | 131 (43.0)                                      | 57 (44.2)                       | 432 (44.8)                            |
| ≥3 years after high school                     | 33,547 (33.9) | 773 (28.6)       | 99 (32.5)                                       | 48 (37.2)                       | 291 (30.2)                            |
| Socio-professional category                    |               |                  |                                                 |                                 |                                       |
| Not available                                  | 15,800 (16.0) | 337 (12.5)       | 25 (8.2)                                        | 11 (8.5)                        | 106 (11.0)                            |
| Teacher                                        | 62,013 (62.6) | 1,632 (60.6)     | 198 (64.9)                                      | 86 (66.7)                       | 609 (63.2)                            |
| Higher managerial and professional occupations | 2,499 (2.5)   | 83 (3.1)         | 9 (3.0)                                         | 3 (2.3)                         | 28 (2.8)                              |
| Intermediate occupations                       | 15,340 (15.5) | 495 (18.4)       | 58 (19.0)                                       | 27 (20.9)                       | 179 (18.6)                            |
| Unemployed                                     | 2,602 (2.6)   | 106 (3.9)        | 10 (3.3)                                        | 1 (0.8)                         | 28 (2.8)                              |
| Other                                          | 741 (0.8)     | 39 (1.5)         | 5 (1.6)                                         | 1 (0.8)                         | 14 (1.5)                              |
| Deprivation index                              | -0.3 (1.0)    | -0.2 (1.0)       | -0.1 (1.0)                                      | -0.2 (0.9)                      | -0.3 (1.1)                            |

Results are presented as n (%) for categorical variables and mean (SD) for continuous variables. RA: rheumatoid arthritis.

### RA cases ascertainment: medical chart review

Mailings were sent to 2,924 of the eligible women (306 women could not be contacted because of death or withdrawn consent), with a recall letter for those who failed to answer. The specific IRD questionnaire was sent back by 2,182 eligible women (74.6%), including 1,833 women who self-reported RA (84%). Medical charts were sent by 594 women (20.3%). Among them, 195 (32.8%) could not be classified because of insufficient provided medical data and were therefore excluded from the performance study. Thus, 399 women provided sufficient medical data to ascertain their diagnosis. Among them, 129 (32.3%) were classified as RA cases, 60 (15.0%) as SpA cases, and 210 (52.6%) as having another diagnosis (*ie* osteoarthritis or other diagnosis). All 399 women completed the IRD questionnaire and had available medication reimbursement data on the MGEN database. The accuracy of the different diagnosis algorithms has been assessed on this subset of 399 women. Among the 399 women, 305 had self-declared RA. The demographic characteristics of these 305 women are described in Table 1.

### Determination of accuracy of self-reported diagnosis and validation algorithms

Accuracy of the validation algorithms compared to medical chart review is described in Table 2. Of the 305 women who self-reported RA with an available medical chart, only 125 (41 %) were confirmed by chart review, leading to a PPV and specificity of self-report of 41 and 33%, respectively. Concordance between self-reported RA alone and medical chart review was low (kappa statistic=0.2).

**Table 2. Agreement between self-reported rheumatic disease and medical chart review**

| Self-reported diagnosis | n    | Available medical chart, n | Confirmed cases, n | Agreement between self-report and medical chart review n (%) |
|-------------------------|------|----------------------------|--------------------|--------------------------------------------------------------|
| RA                      | 2692 | 305                        | 129                | 125 (40.9)                                                   |
| RA only                 | 2583 | 290                        | 129                | 122 (42.1)                                                   |
| SpA                     | 637  | 90                         | 60                 | 48 (53.3)                                                    |
| SpA only                | 528  | 75                         | 60                 | 42 (56.0)                                                    |
| RA and SpA              | 109  | 15                         | 0                  | 0 (0.0)                                                      |
| Total                   | 3230 | 399                        |                    |                                                              |

RA: rheumatoid arthritis; SpA: spondylarthritis.

1  
2  
3 The addition of the IRD questionnaire dramatically improved PPV and specificity  
4 (Table 3). When combining self-reported RA with the IRD questionnaire algorithm (any of the  
5 4 definitions), PPV was 72%, sensitivity 94% and specificity 83%, with a kappa statistic of 0.7.  
6  
7 The combination associated with the best performances (highest PPV, sensitivity and  
8 specificity) was self-reported RA plus use of any specific RA medication; the one with the  
9 lowest specificity was self-reported RA plus confirmation by a rheumatologist of another  
10 physician. The combinations of self-reported RA with positive RF and/or ACPA or with the  
11 ACR criteria were specific but had the lowest sensitivities. Alternate diagnoses for the false  
12 positive cases detected by this algorithm are reported in Table 4.  
13  
14  
15  
16  
17  
18

19 Using medication reimbursement data from the MGEN database also improved PPV  
20 and sensitivities of self-report alone (Table 3). If women self-reported RA and had at least one  
21 reimbursement of any RA specific medication, PPV was 90%, sensitivity 71%, specificity 87%,  
22 and kappa coefficient 0.7. With this algorithm, 10 women were detected by the medication  
23 reimbursement database but did not have RA (false positive cases, Table 4). All of them had  
24 received methotrexate. Also, 38 women were not detected by this algorithm but had RA (false  
25 negative): 21 received methotrexate before 2004, thus before the onset of the MGEN  
26 reimbursement database, 5 received intravenous biologic DMARDs not available in the  
27 database, and 27 received treatments which were not specific enough of RA (online  
28 supplementary table S2).  
29  
30  
31  
32  
33  
34  
35

36 Combining self-report to both IRD questionnaire and medication reimbursement  
37 database improved PPV (98%) but considerably lowered sensitivity (67%), with no  
38 amelioration of the kappa value (Table 3).  
39  
40  
41  
42  
43  
44  
45  
46  
47  
48  
49  
50  
51  
52  
53  
54  
55  
56  
57  
58  
59  
60

**Table 3. Agreement between self-report of RA alone, combined to the IRD questionnaire and to the medication reimbursement database with chart review**

|                                                                                  | Chart review (reference standard) |     |       | Positive Predictive Value, % | Negative Predictive Value, % | Sensitivity, % | Specificity, % | Kappa Coefficient (95% CI) |
|----------------------------------------------------------------------------------|-----------------------------------|-----|-------|------------------------------|------------------------------|----------------|----------------|----------------------------|
|                                                                                  | Yes                               | No  | Total |                              |                              |                |                |                            |
| <b>Self-report of RA</b>                                                         |                                   |     |       |                              |                              |                |                |                            |
| Yes                                                                              | 125                               | 180 | 305   | 41.0                         | 95.7                         | 96.9           | 33.3           | 0.22 (0.17–0.28)           |
| No                                                                               | 4                                 | 90  | 94    |                              |                              |                |                |                            |
| Total                                                                            | 129                               | 270 | 399   |                              |                              |                |                |                            |
| <b>Self-report of RA + IRD questionnaire</b>                                     |                                   |     |       |                              |                              |                |                |                            |
| 1. Confirmation by a rheumatologist or an internal medicine specialist           |                                   |     |       |                              |                              |                |                |                            |
| Yes                                                                              | 120                               | 43  | 166   | 72.3                         | 96.1                         | 93             | 83             | 0.71 (0.65–0.78)           |
| No                                                                               | 9                                 | 224 | 233   |                              |                              |                |                |                            |
| Total                                                                            | 129                               | 270 | 399   |                              |                              |                |                |                            |
| 2. RA medication                                                                 |                                   |     |       |                              |                              |                |                |                            |
| Yes                                                                              | 118                               | 11  | 129   | 91.5                         | 95.9                         | 91.5           | 95.9           | 0.87 (0.82–0.93)           |
| No                                                                               | 11                                | 259 | 270   |                              |                              |                |                |                            |
| Total                                                                            | 129                               | 270 | 399   |                              |                              |                |                |                            |
| 3. Positive RF and/or ACPA                                                       |                                   |     |       |                              |                              |                |                |                            |
| Yes                                                                              | 72                                | 3   | 75    | 96.0                         | 82.4                         | 55.8           | 98.9           | 0.61 (0.53–0.70)           |
| No                                                                               | 57                                | 267 | 324   |                              |                              |                |                |                            |
| Total                                                                            | 129                               | 270 | 399   |                              |                              |                |                |                            |
| 4. ACR criteria                                                                  |                                   |     |       |                              |                              |                |                |                            |
| Yes                                                                              | 63                                | 7   | 70    | 90.0                         | 79.9                         | 48.8           | 97.4           | 0.52 (0.43–0.61)           |
| No                                                                               | 66                                | 263 | 329   |                              |                              |                |                |                            |
| Total                                                                            | 129                               | 270 | 399   |                              |                              |                |                |                            |
| Any of these 4 definitions                                                       |                                   |     |       |                              |                              |                |                |                            |
| Yes                                                                              | 121                               | 47  | 168   | 72.0                         | 96.5                         | 93.8           | 82.6           | 0.71 (0.64–0.78)           |
| No                                                                               | 8                                 | 223 | 231   |                              |                              |                |                |                            |
| Total                                                                            | 129                               | 270 | 399   |                              |                              |                |                |                            |
| <b>Self-report of RA + medication reimbursement database</b>                     |                                   |     |       |                              |                              |                |                |                            |
| Yes                                                                              | 91                                | 10  | 101   | 90.1                         | 87.3                         | 70.5           | 87.3           | 0.71 (0.63–0.78)           |
| No                                                                               | 38                                | 260 | 298   |                              |                              |                |                |                            |
| Total                                                                            | 129                               | 270 | 399   |                              |                              |                |                |                            |
| <b>Self-report of RA + IRD questionnaire + medication reimbursement database</b> |                                   |     |       |                              |                              |                |                |                            |
| Yes                                                                              | 86                                | 2   | 88    | 97.7                         | 86.2                         | 66.7           | 99.3           | 0.72 (0.64–0.79)           |
| No                                                                               | 43                                | 268 | 311   |                              |                              |                |                |                            |
| Total                                                                            | 129                               | 270 | 399   |                              |                              |                |                |                            |

RA: rheumatoid arthritis; IRD: inflammatory rheumatic disease; CI: confidence interval.



**Table 4. Alternate diagnoses for false positive cases detected by the algorithms**

|                                                                             | Alternate diagnosis                                                                                                                                                                                                 |
|-----------------------------------------------------------------------------|---------------------------------------------------------------------------------------------------------------------------------------------------------------------------------------------------------------------|
| False positive cases detected by self-report + IRD questionnaire, N=39      | Osteoarthritis (n=24)<br>Scapulohumeral periarthritis (n=5)<br>Polymyalgia rheumatica (n=3)<br>Primary Sjögren's syndrome (n=3)<br>Systemic lupus erythematosus (n=2)<br>Osteoporosis (n=1)<br>Lumbar sciatic (n=1) |
| False positive cases detected by self-report + reimbursement database, N=10 | Psoriatic arthritis (n=7)<br>Systemic lupus erythematosus (n=2)<br>Osteoarthritis associated with inflammatory bowel disease (n=1)                                                                                  |

IRD: inflammatory rheumatic disease

### Identification of RA cases in the E3N cohort

Finally, we used both algorithms to identify RA cases in our cohort. Among the 1,833 women who answered the IRD questionnaire and self-declared RA, 904 RA cases (49.3%) were confirmed by the algorithm based on the IRD questionnaire (self-reported RA and any of the 4 definitions). Among them we excluded the 47 (5.2%) false positive cases (based on medical chart review) and 34 (3.8%) RA cases without diagnosis date, thus not allowing to know whether they were incident or prevalent. Finally, 823 (44.9%) RA cases were identified by this algorithm. The second algorithm based on the MGEN reimbursement database was used on the 859 remaining eligible women who self-reported RA but did not answer the questionnaire, and identified 141 (16.4%) RA cases. Overall, 964 RA cases were detected by one of the two algorithms, including 698 incident cases and 266 prevalent cases, during a mean follow-up of 25.2 years (Figure 1). In addition, 65.1% of our identified cases have been identified by at least two methods, and 16.4% and 21% have even been validated by three or four methods, respectively (online supplementary table S3). Demographical characteristics of the identified RA cases are shown in Table 1.



## DISCUSSION

In this large prospective cohort of French adult women, we examined the accuracy of self-reported diagnoses of RA and provided interesting information regarding the way to validate these diagnoses. As expected, in our study, the accuracy of self-reported diagnoses of RA was poor. But, combining self-report to a specific IRD questionnaire providing addition self-reported data and/or to a medication reimbursement database, dramatically improved accuracy of RA diagnoses, with high sensitivity, specificity and PPV. Using these algorithms, we could detect nearly one thousand RA cases in this cohort.

The accuracy of self-reported RA diagnoses has previously been evaluated in other cohorts.[7–9,12,13,15,23,24] Reliability, sensitivity, and specificity of self-reported RA varied widely, depending on how the question was phrased, and on the confirmation method (diagnostic registries, chart review, use of ACR criteria, and/or clinical evaluation). When compared to chart review, PPV varies between 7 and 35%.[8,9,15,24,31] In the Nurses' Health Study,[23] Karlson *et al* only confirmed 7% of the original self-reported RA, by reviewing the medical charts to look if women fulfilled the ACR criteria. In our cohort, self-reported diagnoses of RA were accurate for ~ 40% of the cases. Comparison with other studies, mainly involving English language questionnaires, might be difficult. Indeed, our higher rate of accurate diagnoses could be partially explained by language differences, RA and osteoarthritis being phonetically close in English, but not in French.

Nevertheless, this accuracy was not sufficient. Thus, to improve the accuracy of RA diagnosis, we used self-reported data from an IRD questionnaire, derived from a validated questionnaire designed to validate RA and SpA cases by phone interviews in a population of patients of 10 French university hospital rheumatology units.[27] We adapted it with the help of a patients' association that reviewed the wording and phrasing to make it clearly understandable to general population subjects, and we added questions about the presence or absence of RF and/or ACPA and on RA medication. Using this questionnaire, self-report of RA combined to a self-reported use of RA medication had the excellent accuracy, with both high sensitivity and specificity. Although very specific, and useful for further disease phenotyping, a self-report of positive RF and/or ACPA resulted in a low sensitivity and using this definition might miss RA cases. Using the ACR criteria in the IRD questionnaire resulted in a low sensitivity, because those criteria were not designed to be used in self-reported questionnaires, nevertheless they were highly specific. Our results demonstrate that the use of a limited list of items, particularly focusing on specific medications, in a dedicated questionnaire could drastically improve self-report accuracy.

1  
2  
3 We also assessed the performance of the algorithm using the medication reimbursement  
4 database. This method had been used to identify RA cases in the first study on RA in the E3N  
5 cohort study.[29] As expected, the algorithm has an excellent specificity and PPV, but  
6 underestimates the number of RA cases. Indeed, the database included all medications delivered  
7 by community-based pharmacies since 2004 and we only considered methotrexate,  
8 leflunomide, sub-cutaneous TNF- $\alpha$  inhibitors, and sub-cutaneous abatacept or tocilizumab;  
9 therefore we could not detect RA cases treated before 2004 and no longer treated with those  
10 drugs, those only treated by intravenous biologics delivered by hospital pharmacies only, and  
11 those with other treatments (e.g. hydroxychloroquine). Thus, if an exhaustive medication  
12 reimbursement database was available, using this algorithm could probably lead to both high  
13 specificities and high sensitivities.  
14  
15  
16  
17  
18  
19  
20  
21

22 Using both algorithms, we detected nearly one thousand RA cases, mainly incident  
23 cases. Since a proper evaluation with the reference standard (ie medical chart review) was not  
24 available for all women, there might be some false positive RA cases among them. But given  
25 the number of methods used to limit their number and their accuracy, this rate might be small.  
26  
27  
28

29 We acknowledge some limitations to the present study. First, it was not designed to  
30 estimate the number of unreported RA cases in our cohort. Our population of non-cases were  
31 women who did not self-report RA but self-reported another IRD, which could bias our results.  
32 Ideally, we would have analysed medical records from women who did not report any IRD to  
33 determine the proportion of cases missed. Thus, reported sensitivities and NPVs but should be  
34 interpreted with caution. However, our main concern was to avoid false positive cases ie to  
35 ascertain detected cases, rather than to avoid missing a few cases. Therefore, there may be a  
36 few undetected RA cases in the control group, but the number of these cases is likely to be  
37 small, and, given the large number of non-cases in our cohort, the risk of bias induced by the  
38 false negative cases is negligible. Also, our validation study relies on an additional  
39 questionnaire. Answers to this questionnaire were not obtained for all women, which might  
40 have created a response bias. However, such bias was limited by using the medication  
41 reimbursement database for women who did not answer to the IRD questionnaire.  
42  
43  
44  
45  
46  
47  
48  
49  
50

51 Another limitation could be the representativeness of the sample of women who  
52 provided their medical records, sent on a voluntary basis, thus not at random. This could have  
53 introduced a selection bias toward more severe disease, inflating the accuracy. However,  
54 medical chart review confirmed the diagnosis of RA in only 41% of them, showing that both  
55 cases and non-cases provided medical chart. Also, women who provided their medical charts  
56  
57  
58  
59  
60

1  
2  
3 did not differ from other women who self-reported IRD in terms of age or education level,  
4 which may limit the bias.  
5

6 Finally, the algorithms we devised to improve accuracy of self-reported RA diagnoses  
7 could prove useful to validate RA diagnoses in other population-based cohorts. However, they  
8 could be difficult to transpose from the French care setting to another one; thus, all data  
9 potentially available for validation (medication database, national patient registries, primary  
10 care records and/or hospital discharge databases) must be considered.  
11  
12  
13  
14  
15  
16  
17

## 18 **CONCLUSIONS**

19 To conclude, our study highlights the poor accuracy of self-reported RA diagnoses, even among  
20 educated women. We demonstrated that this accuracy could be improved using medication  
21 reimbursement data and/or other self-reported data from a specific questionnaire. Even if  
22 ascertaining RA diagnoses with a complete medical chart review might probably be one of the  
23 best option, it appears that obtaining other information, particularly on RA specific treatment,  
24 either from the patients themselves or from health insurance databases can be a reasonably good  
25 alternative, sparing the difficulties of obtaining complete medical charts, and the time and cost  
26 of medical chart review. Even much less sensitive, obtaining confirmation of ACPA or RF  
27 positivity from patients was also highly specific, and offer the advantage of giving a key  
28 phenotypic characteristic, particularly important when studying RA risk factors. Our results  
29 could help other teams that aim at ascertaining RA cases in large epidemiological studies. Also,  
30 the validation of almost 1.000 RA cases in our cohort will serve as a basis to future  
31 epidemiological studies, since the design and the long follow-up of participants of our cohort  
32 will be used to investigate many potential RA risk factors.  
33  
34  
35  
36  
37  
38  
39  
40  
41  
42  
43  
44  
45  
46  
47  
48  
49  
50  
51  
52  
53  
54  
55  
56  
57  
58  
59  
60

## ACKNOWLEDGEMENTS

The authors are indebted to all participants for their continued participation. The authors would like to thank Pascale Gerbouin-Rerolle, Maxime Valdenaire and Roselyn Rima Gomes for their help on data management. They also acknowledge the AFPric patients' association that helped to review the wording and phrasing of the validation questionnaire, particularly Patricia Preiss and Angelique Hochodé.

## AUTHOR CONTRIBUTIONS

All authors contributed to the manuscript. YN, CS, ED, XM, MCB and RS were responsible for conception and design. YN, GG, MCB and RS were responsible for collection of data and analysis. All authors were responsible for the interpretation of data. YN and RS wrote the first version of the manuscript. All authors critically revised and approved the final version of the manuscript.

## FUNDING

The present work was performed using data from the Inserm E3N cohort and support from the MGEN, Gustave Roussy, and the *Ligue contre le Cancer* for setting up and maintaining the cohort. The study was also supported by a state grant ANR-10-COHO-0006 from the *Agence Nationale de la Recherche* within the *Investissement d'Avenir* program. In addition, this study was conducted thanks to the help of an unrestricted grant from the *Société Française de Rhumatologie*.

## ETHICAL APPROVAL INFORMATION

This study was approved by the French authorities ("Comité Consultatif sur le Traitement de l'information en matière de Recherche dans le domaine de la Santé" and "Commission Nationale de l'Informatique et des Libertés"). An informed consent was obtained from all patients.

## COMPETING INTERESTS

None of the authors declared any competing interest in link with the present study

## DATA SHARING

Data are available on demand by emailing the corresponding author.

## REFERENCES

- 1 Klareskog L, Padyukov L, Rönnelid J, *et al.* Genes, environment and immunity in the development of rheumatoid arthritis. *Curr Opin Immunol* 2006;**18**:650–5. doi:10.1016/j.coi.2006.06.004
- 2 Karlson EW, Chang S-C, Cui J, *et al.* Gene-environment interaction between HLA-DRB1 shared epitope and heavy cigarette smoking in predicting incident rheumatoid arthritis. *Ann Rheum Dis* 2010;**69**:54–60. doi:10.1136/ard.2008.102962
- 3 Linn-Rasker SP, van der Helm-van Mil AHM, van Gaalen FA, *et al.* Smoking is a risk factor for anti-CCP antibodies only in rheumatoid arthritis patients who carry HLA-DRB1 shared epitope alleles. *Ann Rheum Dis* 2006;**65**:366–71. doi:10.1136/ard.2005.041079
- 4 Lee H-S, Irigoyen P, Kern M, *et al.* Interaction between smoking, the shared epitope, and anti-cyclic citrullinated peptide: a mixed picture in three large North American rheumatoid arthritis cohorts. *Arthritis Rheum* 2007;**56**:1745–53. doi:10.1002/art.22703
- 5 Bang S-Y, Lee K-H, Cho S-K, *et al.* Smoking increases rheumatoid arthritis susceptibility in individuals carrying the HLA-DRB1 shared epitope, regardless of rheumatoid factor or anti-cyclic citrullinated peptide antibody status. *Arthritis Rheum* 2010;**62**:369–77. doi:10.1002/art.27272
- 6 Willemze A, van der Woude D, Ghiddey W, *et al.* The interaction between HLA shared epitope alleles and smoking and its contribution to autoimmunity against several citrullinated antigens. *Arthritis Rheum* 2011;**63**:1823–32. doi:10.1002/art.30409
- 7 Kvien TK, Glennås A, Knudsrød OG, *et al.* The validity of self-reported diagnosis of rheumatoid arthritis: results from a population survey followed by clinical examinations. *J Rheumatol* 1996;**23**:1866–71.
- 8 Star VL, Scott JC, Sherwin R, *et al.* Validity of self-reported rheumatoid arthritis in elderly women. *J Rheumatol* 1996;**23**:1862–5.
- 9 Ling SM, Fried LP, Garrett E, *et al.* The accuracy of self-report of physician diagnosed rheumatoid arthritis in moderately to severely disabled older women. Women's Health and Aging Collaborative Research Group. *J Rheumatol* 2000;**27**:1390–4.
- 10 Barlow JH, Turner AP, Wright CC. Comparison of clinical and self-reported diagnoses for participants on a community-based arthritis self-management programme. *Br J Rheumatol* 1998;**37**:985–7.
- 11 Cooper GS, Wither J, McKenzie T, *et al.* The prevalence and accuracy of self-reported history of 11 autoimmune diseases. *J Rheumatol* 2008;**35**:2001–4.
- 12 Walitt BT, Constantinescu F, Katz JD, *et al.* Validation of self-report of rheumatoid arthritis and systemic lupus erythematosus: The Women's Health Initiative. *J Rheumatol* 2008;**35**:811–8.
- 13 Formica MK, McAlindon TE, Lash TL, *et al.* Validity of self-reported rheumatoid arthritis in a large cohort: results from the Black Women's Health Study. *Arthritis Care Res* 2010;**62**:235–41. doi:10.1002/acr.20073

- 14 Gill TK, Hill CL. The Accuracy of Self-report in Rheumatic Diseases. *J Rheumatol* 2017;**44**:1109–11. doi:10.3899/jrheum.170564
- 15 Videm V, Thomas R, Brown MA, *et al.* Self-reported Diagnosis of Rheumatoid Arthritis or Ankylosing Spondylitis Has Low Accuracy: Data from the Nord-Trøndelag Health Study. *J Rheumatol* 2017;**44**:1134–41. doi:10.3899/jrheum.161396
- 16 O'Rourke JA, Ravichandran C, Howe YJ, *et al.* Accuracy of self-reported history of autoimmune disease: A pilot study. *PloS One* 2019;**14**:e0216526. doi:10.1371/journal.pone.0216526
- 17 Linauskas A, Overvad K, Berg Johansen M, *et al.* Positive predictive value of first-time rheumatoid arthritis diagnoses and their serological subtypes in the Danish National Patient Registry. *Clin Epidemiol* 2018;**10**:1709–20. doi:10.2147/CLEP.S175406
- 18 Linauskas A, Overvad K, Symmons D, *et al.* Body Fat Percentage, Waist Circumference, and Obesity As Risk Factors for Rheumatoid Arthritis: A Danish Cohort Study. *Arthritis Care Res* 2019;**71**:777–86. doi:10.1002/acr.23694
- 19 Sundstrom B, Johansson I, Rantapaa-Dahlqvist S. Interaction between dietary sodium and smoking increases the risk for rheumatoid arthritis: results from a nested case-control study. *Rheumatology* 2015;**54**:487–93. doi:10.1093/rheumatology/keu330
- 20 Fisher BA, Cartwright AJ, Quirke A-M, *et al.* Smoking, Porphyromonas gingivalis and the immune response to citrullinated autoantigens before the clinical onset of rheumatoid arthritis in a Southern European nested case-control study. *BMC Musculoskelet Disord* 2015;**16**:331. doi:10.1186/s12891-015-0792-y
- 21 Muller S, Hider SL, Raza K, *et al.* An algorithm to identify rheumatoid arthritis in primary care: a Clinical Practice Research Datalink study. *BMJ Open* 2015;**5**:e009309. doi:10.1136/bmjopen-2015-009309
- 22 Singh JA, Holmgren AR, Noorbaloochi S. Accuracy of Veterans Administration databases for a diagnosis of rheumatoid arthritis. *Arthritis Rheum* 2004;**51**:952–7. doi:10.1002/art.20827
- 23 Karlson Elizabeth W., Mandl Lisa A., Hankinson Susan E., *et al.* Do breast-feeding and other reproductive factors influence future risk of rheumatoid arthritis?: Results from the Nurses' Health Study. *Arthritis Rheum* 2004;**50**:3458–67. doi:10.1002/art.20621
- 24 Mikuls TR, Cerhan JR, Criswell LA, *et al.* Coffee, tea, and caffeine consumption and risk of rheumatoid arthritis: results from the Iowa Women's Health Study. *Arthritis Rheum* 2002;**46**:83–91. doi:10.1002/1529-0131(200201)46:1<83::AID-ART10042>3.0.CO;2-D
- 25 Lahiri M, Luben RN, Morgan C, *et al.* Using lifestyle factors to identify individuals at higher risk of inflammatory polyarthritis (results from the European Prospective Investigation of Cancer-Norfolk and the Norfolk Arthritis Register--the EPIC-2-NOAR Study). *Ann Rheum Dis* 2014;**73**:219–26. doi:10.1136/annrheumdis-2012-202481
- 26 Clavel-Chapelon F, van Liere MJ, Giubout C, *et al.* E3N, a French cohort study on cancer risk factors. E3N Group. Etude Epidémiologique auprès de femmes de l'Education Nationale. *Eur J Cancer Prev Off J Eur Cancer Prev Organ ECP* 1997;**6**:473–8.



- 1  
2  
3 27 Guillemin F, Saraux A, Fardellone P, *et al.* Detection of cases of inflammatory rheumatic  
4 disorders: performance of a telephone questionnaire designed for use by patient  
5 interviewers. *Ann Rheum Dis* 2003;**62**:957–63. doi:10.1136/ard.62.10.957  
6  
7  
8 28 Arnett FC, Edworthy SM, Bloch DA, *et al.* The american rheumatism association 1987  
9 revised criteria for the classification of rheumatoid arthritis. *Arthritis Rheum*;**31**:315–24.  
10 doi:10.1002/art.1780310302  
11  
12 29 Seror R, Henry J, Gusto G, *et al.* Passive smoking in childhood increases the risk of  
13 developing rheumatoid arthritis. *Rheumatology* 2019;**58**:1154–62.  
14 doi:10.1093/rheumatology/key219  
15  
16 30 Aletaha D, Neogi T, Silman AJ, *et al.* 2010 rheumatoid arthritis classification criteria: an  
17 American College of Rheumatology/European League Against Rheumatism collaborative  
18 initiative. *Ann Rheum Dis* 2010;**69**:1580–8. doi:10.1136/ard.2010.138461  
19  
20 31 Karlson E, Sanchez-Guerrero J, Wright EA, *et al.* A connective tissue disease screening  
21 questionnaire for population studies. *Ann Epidemiol* 1995;**5**:297–302. doi:10.1016/1047-  
22 2797(94)00096-C  
23  
24  
25  
26  
27  
28  
29  
30  
31  
32  
33  
34  
35  
36  
37  
38  
39  
40  
41  
42  
43  
44  
45  
46  
47  
48  
49  
50  
51  
52  
53  
54  
55  
56  
57  
58  
59  
60

## FIGURE LEGENDS

### Figure 1. Flow chart of the identification of RA cases in the E3N cohort.

E3N: “Etude Epidémiologique auprès des femmes de la Mutuelle générale de l’Education Nationale”; RA: rheumatoid arthritis; SpA: spondylarthritis; IRD: inflammatory rheumatic disease; MGEN: “Mutuelle Générale de l’Education Nationale”.

For peer review only



1  
2  
3  
4  
5  
6  
7  
8  
9  
10  
11  
12  
13  
14  
15  
16  
17  
18  
19  
20  
21  
22  
23  
24  
25  
26  
27  
28  
29  
30  
31  
32  
33  
34  
35  
36  
37  
38  
39  
40  
41  
42  
43  
44  
45  
46  
47  
48

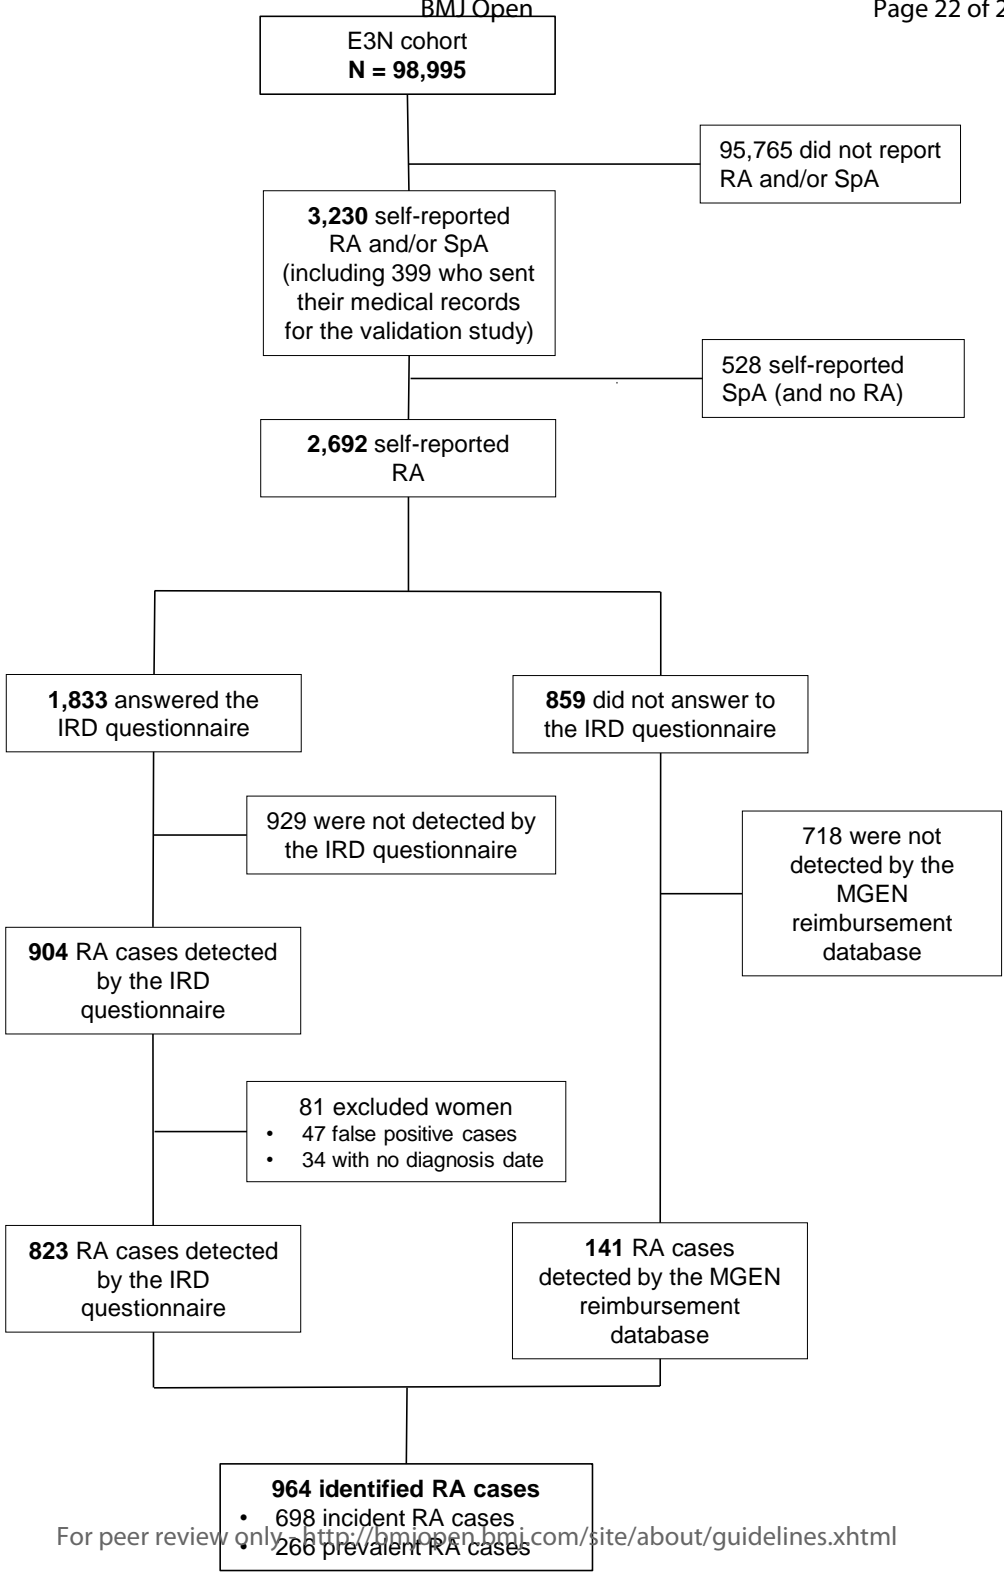

**Appendix S1. Specific IRD questionnaire, adapted from Guillemin et al. [25].**

Subjects are asked to answer “yes” or “no” to the following questions:

Q0. Do you confirm having one of these rheumatic disorders?

Q1. Which was your rheumatic disease?

- Rheumatoid arthritis?
- Spondyloarthritis / axial spondyloarthritis and/or peripheral spondyloarthritis (formerly called ankylosing spondyloarthritis)?
- Psoriatic arthritis?
- Other: please precise

Q2. Was this diagnosis confirmed by a physician? If “yes”, which one?

- Rheumatologist
- General practitioner
- Internist
- Other

Q3. What was the date of diagnosis?

Q4. What was the date of first symptoms?

Q5. Do you have full reimbursement for health care for this disease (*ALD – Affection longue durée*)?

**Concerning your joint pain:**

Q6. Are you at present experiencing, or have you in the past experienced, pains in your joints more than 2 weeks in a row (hands, wrists, feet, shoulder, elbows, knees)?

Q7. Are your joints swollen or have they been in the past?

Q8. Are or were your joints symmetrically affected, that is to say about the same on each side? (both hands, or both feet for example)

Q9. Are or were your hands affected?

Q10. Are or were your lower limbs affected (that is to say, your groin, your hip joint, your knees, your ankles, or your feet)?

Q11. Are or were more than three joints affected?

Q12. Has the pain lasted or did it last more than six weeks?

Q13. Have you ever been woken up by joint pain?

Q14. Are or were your joints stiff in the morning?

If Yes: For about how many minutes?

- < 30 minutes
- 30 minutes to 1 hour
- > 1 hour

Q15. Have you or have you had nodules under the skin on your elbows or hands?

1  
2  
3 Q16. Have you had the rheumatoid factor test, sometimes called the latex test or the Waaler-  
4 Rose test? If “yes”: Do you know if it was positive?  
5

6 Q17. Have you had the anti CCP test, sometimes called ACPA test? If “yes”: Do you know if  
7 it was positive?  
8

9 Q18. Have you had anti-illagrin antibody test or anti-keratin antibody test? If “yes”: Do you  
10 know if it was positive?  
11

12 Q19. Have you had x ray examinations of your hands and wrists?  
13

14  
15 *[Q20 to Q33: specific questions for axial spondyloarthritis and/or psoriatic rheumatism]*  
16  
17

18  
19 Q34. Among the following treatment, which one(s) do or did you receive for your disease?  
20

- 21  methotrexate (Novatrex®, Imeth®, Metoject®)
- 22  leflunomide (Arava®)
- 23  sulfasalazine (Salazopyrine®)
- 24  hydroxychloroquine (Plaquenil®)
- 25  azathioprine (Imurel®)
- 26  gold salts, aurothiopropansulfonate (Allochrysine®, Auranofin®)
- 27  ciclosporine (Neoral®)
- 28  D-penicillamine (Trolovol®)
- 29  tiopronine (Acadione®)
- 30  Anakinra (Kineret®)
- 31  infliximab (Remicade®, Inflectra®, Remsima®)
- 32  etanercept (Enbrel®, Benepali®)
- 33  adalimumab (Humira®)
- 34  certolizumab (Cimzia®)
- 35  golimumab (Simponi®)
- 36  abatacept (Orencia®)
- 37  tocilizumab (Roactemra®)
- 38  rituximab (Mabthera)
- 39
- 40
- 41
- 42
- 43
- 44
- 45
- 46
- 47
- 48
- 49
- 50
- 51
- 52
- 53
- 54
- 55
- 56
- 57
- 58
- 59
- 60

**Table S1.** Used algorithms to identify of rheumatoid arthritis cases in the E3N-EPIC cohort

---

**Identification algorithm**

---

**Algorithm 1: using the IRD questionnaire**

Self-report of RA (Q1) + at least one of the following criteria:

1. diagnosis confirmed by a rheumatologist or physician (Q2)
2. current or past use of csDMARDs and/or bDMARDs (Q34)
3. positive RF and/or ACPA and/or anti-illagrin and/or anti-keratin antibody (Q16, Q17 and Q18)
4. sum of the following questions  $\geq 4$  (1 point per positive answer at each question)
  - Symmetrically affected joints (Q8)
  - Affected hands (Q9)
  - More than three joints affected (Q11)
  - Stiff joints in the morning > 1 hour (Q14)
  - Nodules under the skin on elbows or hands (Q15)
  - Positive RF, or ACPA, or anti-illagrin antibody or anti-keratin antibody (Q16, Q17, or Q18).

**Algorithm 2: using the drug reimbursement database**

Self-report of RA in the three follow-up questionnaires (2007, 2011, 2014) + at least one reimbursement of csDMARDs and/or bDMARDs among methotrexate, leflunomide, all sub-cutaneous TNF- $\alpha$  inhibitors, sub-cutaneous abatacept and sub-cutaneous tocilizumab

---

IRD: inflammatory rheumatic diseases; RA: rheumatoid arthritis; csDMARDs: conventional synthetic disease modifying anti-rheumatic drugs; bDMARDs: conventional synthetic disease modifying anti-rheumatic drugs; TNF- $\alpha$ : tumor necrosis factor alpha.

**Table S2.** RA treatment of the 38 false negative RA cases not detected by the reimbursement database

| <b>Treatment</b>      | <b>N</b> |
|-----------------------|----------|
| Methotrexate*         | 21       |
| Glucocorticoids alone | 8        |
| Hydroxychloroquine    | 14       |
| Sulfasalazine         | 5        |
| Infliximab            | 4        |
| Rituximab             | 1        |

\*Women received methotrexate before 2004, before the onset of the medication database

**Table S3.** Number of fulfilled criteria for the 964 identified RA cases

| Number of methods | Validation method               |                        |            |              | n (%)      | Total n (%) |
|-------------------|---------------------------------|------------------------|------------|--------------|------------|-------------|
|                   | Rheumatologist and/or physician | Treatment <sup>¶</sup> | Antibodies | ACR criteria |            |             |
| 4                 |                                 |                        |            |              | 202 (21.0) | 202 (21.0)  |
| 3                 |                                 |                        |            |              | 81 (8.4)   | 158 (16.4)  |
|                   |                                 |                        |            |              | 61 (6.3)   |             |
|                   |                                 |                        |            |              | 14 (1.5)   |             |
|                   |                                 |                        |            |              | 2 (0.2)    |             |
| 2                 |                                 |                        |            |              | 1 (0.1)    | 268 (27.8)  |
|                   |                                 |                        |            |              | 1 (0.1)    |             |
|                   |                                 |                        |            |              | 222 (23.0) |             |
|                   |                                 |                        |            |              | 12 (1.2)   |             |
|                   |                                 |                        |            |              | 32 (3.3)   |             |
| 1                 |                                 |                        |            |              | 1 (0.1)    | 336 (34.9)  |
|                   |                                 |                        |            |              | 1 (0.1)    |             |
|                   |                                 |                        |            |              | 141 (14.6) |             |
|                   |                                 |                        |            |              | 193 (20.0) |             |
| N (%)             | 828 (85.9)                      | 699 (72.5)             | 314 (32.6) | 313 (32.5)   | 964        |             |

<sup>¶</sup>Treatments have been collected through validation questionnaire and/or by the drug reimbursement database.
