# Supplementary material for: Improving accuracy of self-reported diagnoses of rheumatoid arthritis in the French prospective E3N-EPIC cohort: a validation study
Source: PubMed Central journal article supplement — BMJ Open. 2019 Dec 16;9(12):e033536. doi: 10.1136/bmjopen-2019-033536 (PMC6937120; doi:10.1136/bmjopen-2019-033536), 2019-12-16
Supplement: bmjopen-2019-033536supp002.pdf [file bmjopen-2019-033536supp002.pdf]

**Table S1.** Used algorithms to identify of rheumatoid arthritis cases in the E3N-EPIC cohort

---

**Identification algorithm**

---

**Algorithm 1: using the IRD questionnaire**

Self-report of RA (Q1) + at least one of the following criteria:

1. diagnosis confirmed by a rheumatologist or physician (Q2)
2. current or past use of csDMARDs and/or bDMARDs (Q34)
3. positive RF and/or ACPA and/or anti-illagrin and/or anti-keratin antibody (Q16, Q17 and Q18)
4. sum of the following questions  $\geq 4$  (1 point per positive answer at each question)
  - Symmetrically affected joints (Q8)
  - Affected hands (Q9)
  - More than three joints affected (Q11)
  - Stiff joints in the morning > 1 hour (Q14)
  - Nodules under the skin on elbows or hands (Q15)
  - Positive RF, or ACPA, or anti-illagrin antibody or anti-keratin antibody (Q16, Q17, or Q18).

**Algorithm 2: using the drug reimbursement database**

Self-report of RA in the three follow-up questionnaires (2007, 2011, 2014) + at least one reimbursement of csDMARDs and/or bDMARDs among methotrexate, leflunomide, all sub-cutaneous TNF- $\alpha$  inhibitors, sub-cutaneous abatacept and sub-cutaneous tocilizumab

---

IRD: inflammatory rheumatic diseases; RA: rheumatoid arthritis; csDMARDs: conventional synthetic disease modifying anti-rheumatic drugs; bDMARDs: conventional synthetic disease modifying anti-rheumatic drugs; TNF- $\alpha$ : tumor necrosis factor alpha.
