# Supplementary material for: Improving accuracy of self-reported diagnoses of rheumatoid arthritis in the French prospective E3N-EPIC cohort: a validation study
Source: PubMed Central journal article supplement — BMJ Open. 2019 Dec 16;9(12):e033536. doi: 10.1136/bmjopen-2019-033536 (PMC6937120; doi:10.1136/bmjopen-2019-033536), 2019-12-16
Supplement: bmjopen-2019-033536supp003.pdf [file bmjopen-2019-033536supp003.pdf]

**Table S2.** RA treatment of the 38 false negative RA cases not detected by the reimbursement database

| <b>Treatment</b>      | <b>N</b> |
|-----------------------|----------|
| Methotrexate*         | 21       |
| Glucocorticoids alone | 8        |
| Hydroxychloroquine    | 14       |
| Sulfasalazine         | 5        |
| Infliximab            | 4        |
| Rituximab             | 1        |

\*Women received methotrexate before 2004, before the onset of the medication database
