# Supplementary material for: Improving accuracy of self-reported diagnoses of rheumatoid arthritis in the French prospective E3N-EPIC cohort: a validation study
Source: PubMed Central journal article supplement — BMJ Open. 2019 Dec 16;9(12):e033536. doi: 10.1136/bmjopen-2019-033536 (PMC6937120; doi:10.1136/bmjopen-2019-033536), 2019-12-16
Supplement: bmjopen-2019-033536supp004.pdf [file bmjopen-2019-033536supp004.pdf]

**Table S3.** Number of fulfilled criteria for the 964 identified RA cases

| Number of methods | Validation method               |                        |            |              | n (%)      | Total n (%) |
|-------------------|---------------------------------|------------------------|------------|--------------|------------|-------------|
|                   | Rheumatologist and/or physician | Treatment <sup>¶</sup> | Antibodies | ACR criteria |            |             |
| 4                 |                                 |                        |            |              | 202 (21.0) | 202 (21.0)  |
| 3                 |                                 |                        |            |              | 81 (8.4)   | 158 (16.4)  |
|                   |                                 |                        |            |              | 61 (6.3)   |             |
|                   |                                 |                        |            |              | 14 (1.5)   |             |
|                   |                                 |                        |            |              | 2 (0.2)    |             |
| 2                 |                                 |                        |            |              | 1 (0.1)    | 268 (27.8)  |
|                   |                                 |                        |            |              | 1 (0.1)    |             |
|                   |                                 |                        |            |              | 222 (23.0) |             |
|                   |                                 |                        |            |              | 12 (1.2)   |             |
| 1                 |                                 |                        |            |              | 32 (3.3)   | 336 (34.9)  |
|                   |                                 |                        |            |              | 1 (0.1)    |             |
|                   |                                 |                        |            |              | 1 (0.1)    |             |
|                   |                                 |                        |            |              | 141 (14.6) |             |
|                   |                                 |                        |            |              | 193 (20.0) |             |
| N (%)             | 828 (85.9)                      | 699 (72.5)             | 314 (32.6) | 313 (32.5)   | 964        |             |

<sup>¶</sup>Treatments have been collected through validation questionnaire and/or by the drug reimbursement database.
